# Supplementary material for: Physicochemical Properties and Microbiome of Vineyard Soils from DOP Ribeiro (NW Spain) Are Influenced by Agricultural Management
Source: MDPI journal article supplement (doi:10.3390/microorganisms12030595), 2024-03-16

Table S1. Mean temperature at 1.5m above ground registered by the three stations of the study area provided from meteogalicia.gal (Station 1: EVEGA Leiro, Station 2: Remuíño Arnoia and Station 3: Prado-Castrelo de Miño).

| YEAR | SEASON | MONTH     | Mean temperature at 1.5m above ground (°C) |           |           |
|------|--------|-----------|--------------------------------------------|-----------|-----------|
|      |        |           | Station 1                                  | Station 2 | Station 3 |
| 2022 | WINTER | JANUARY   | 5.3                                        | 5         | 6.1       |
|      |        | FEBRUARY  | 8                                          | 7.9       | 8.6       |
|      |        | MARCH     | 10.4                                       | 10.3      | 10.8      |
|      | SPRING | APRIL     | 12.2                                       | 12.3      | 12.6      |
|      |        | MAY       | 18.1                                       | 17.9      | 18.4      |
|      |        | JUNE      | 19                                         | 18.8      | 19.1      |
|      | SUMMER | JULY      | 24.3                                       | 24.1      | 24.6      |
|      |        | AUGUST    | 23.8                                       | 23.6      | 24        |
|      |        | SEPTEMBER | 19.3                                       | 18.8      | 19.5      |
|      | AUTUMN | OCTOBER   | 16.5                                       | 16.4      | 17        |
|      |        | NOVEMBER  | 11.5                                       | 11.4      | 11.9      |
|      |        | DECEMBER  | 10.8                                       | 10.9      | 11.4      |
| 2023 | WINTER | JANUARY   | 7.1                                        | 7         | 7.6       |
|      |        | FEBRUARY  | 6.6                                        | 6.3       | 7.2       |
|      |        | MARCH     | 11.8                                       | 11.9      | 12.2      |

Table S2. Total rain ( $L m^{-2}$ ) registered in the three stations of the study area provided from meteogalicia.gal (Station 1: EVEGA Leiro, Station 2: Remuíño Arnoia and Station 3: Prado-Castrelo de Miño).

| YEAR | SEASON | MONTH     | Total rain ( $L m^{-2}$ ) |           |           |
|------|--------|-----------|---------------------------|-----------|-----------|
|      |        |           | Station 1                 | Station 2 | Station 3 |
| 2022 | WINTER | JANUARY   | 15.4                      | 22.6      | 16.8      |
|      |        | FEBRUARY  | 23.6                      | 30        | 14.6      |
|      |        | MARCH     | 85.2                      | 91.6      | 87.1      |
|      | SPRING | APRIL     | 79.6                      | 76.4      | 65.1      |
|      |        | MAY       | 14.4                      | 14.4      | 13.5      |
|      |        | JUNE      | 69                        | 96.8      | 54        |
|      | SUMMER | JULY      | 9.6                       | 1.4       | 9.3       |
|      |        | AUGUST    | 7                         | 2.8       | 14.6      |
|      |        | SEPTEMBER | 56.8                      | 73.8      | 57.2      |
|      | AUTUMN | OCTOBER   | 298                       | 248       | 243.6     |
|      |        | NOVEMBER  | 190                       | 242.2     | 217.5     |
|      |        | DECEMBER  | 308                       | 275.3     | 235.3     |
| 2023 | WINTER | JANUARY   | 191.6                     | 226.8     | 199.5     |
|      |        | FEBRUARY  | 15                        | 19        | 16.7      |
|      |        | MARCH     | 80.2                      | 120.4     | 66.1      |

Figure S1. Fe and Al fractionation

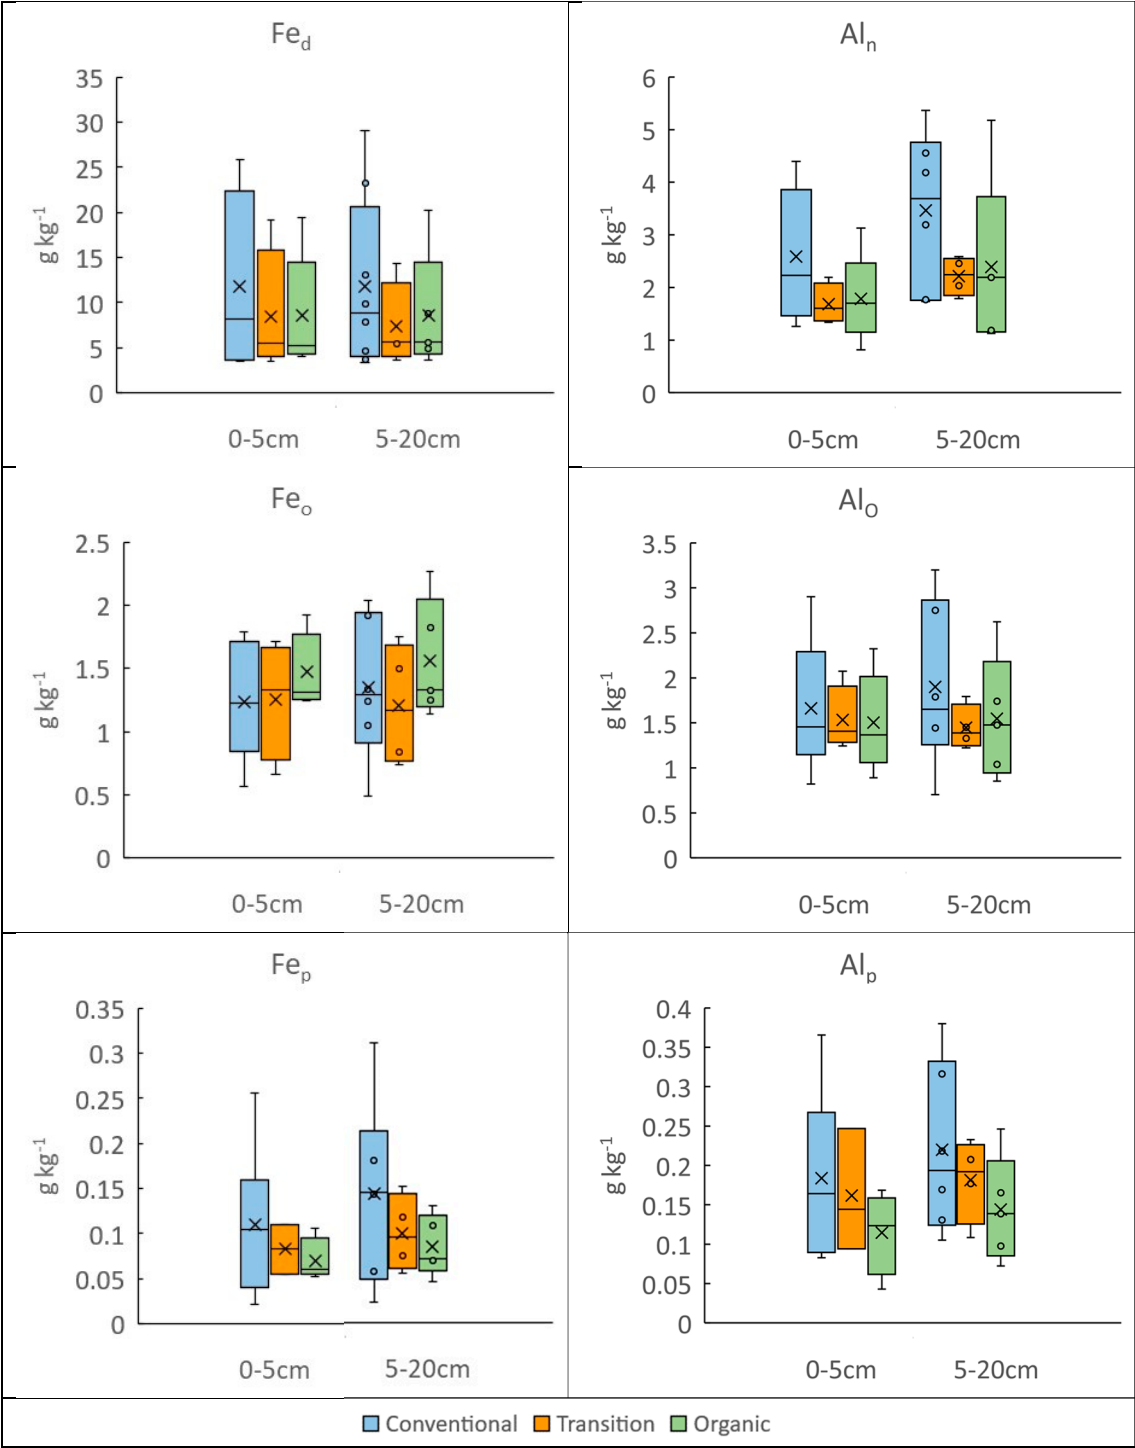

Figure S2. Released concentrations of Cu after fractionation study

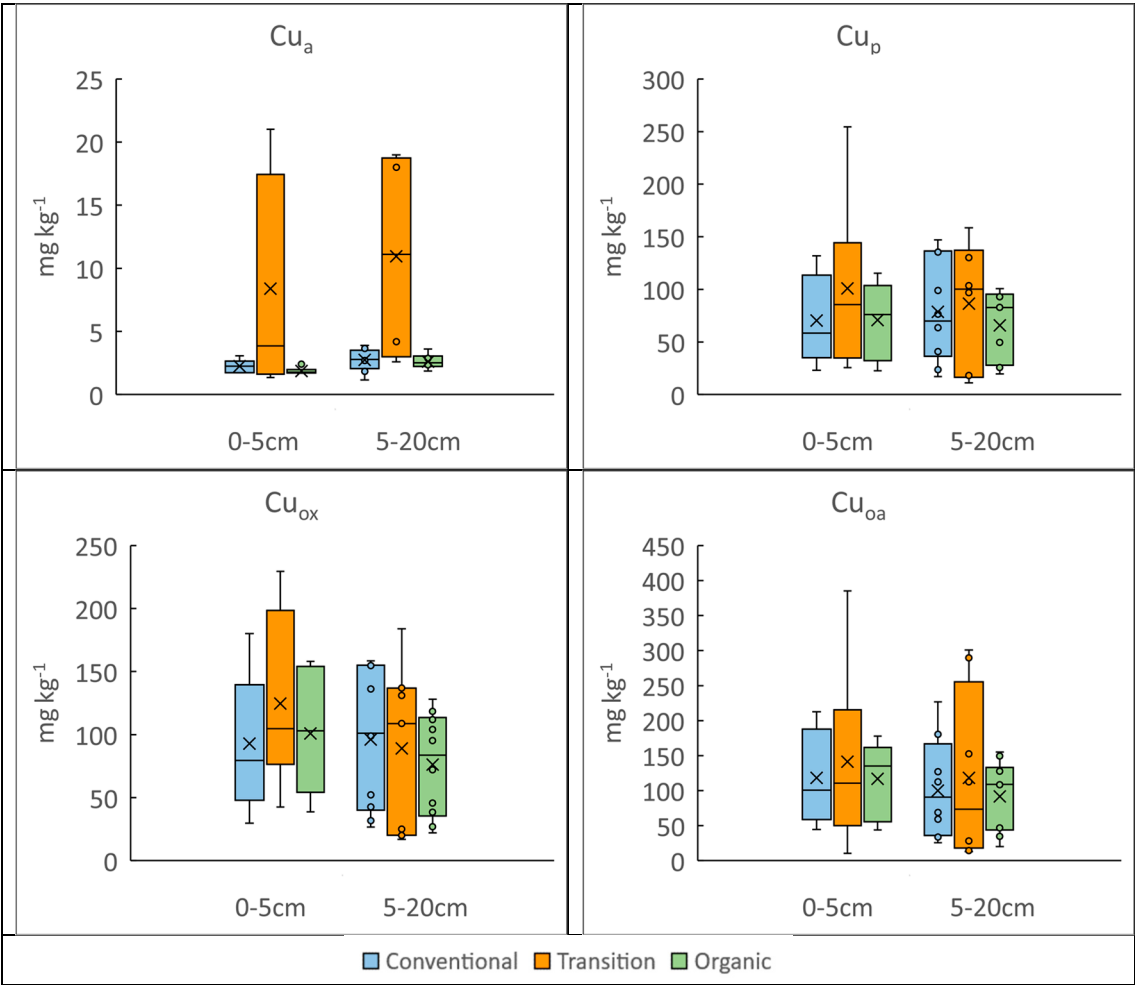

Figure S3. Distribution of total Cu and Zn among soil different fractions

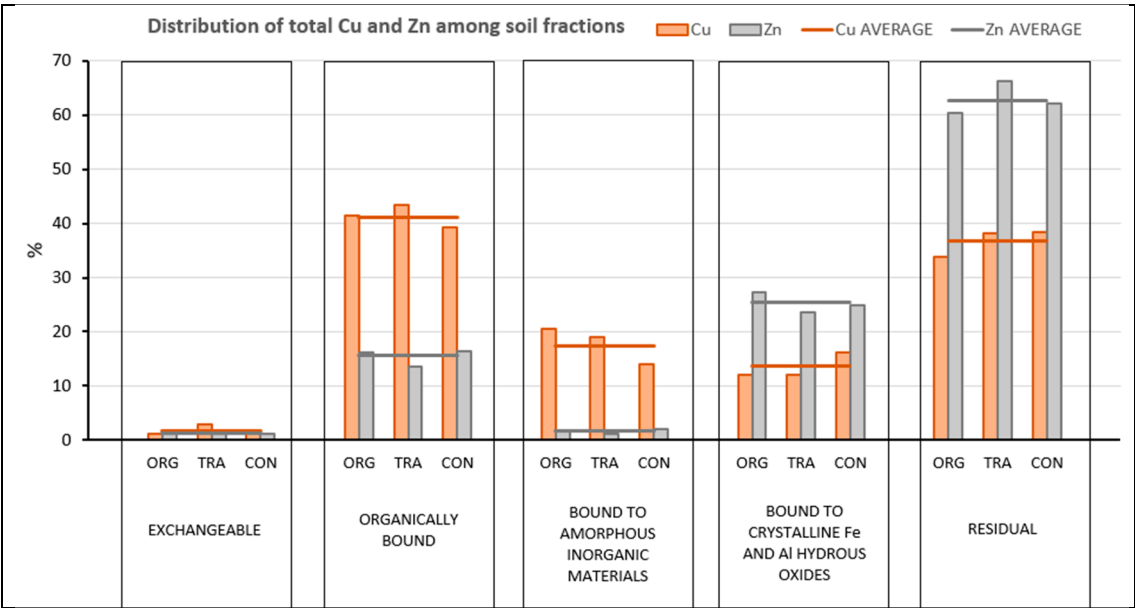

Supplement: s1 [file s1]
