# Supplementary material for: Physicochemical Properties and Microbiome of Vineyard Soils from DOP Ribeiro (NW Spain) Are Influenced by Agricultural Management
Source: MDPI journal article supplement (doi:10.3390/microorganisms12030595), 2024-03-16
Supplement: s1 [file s1]

**Table S5.** BeCrop® indexes list and definition grouped by their respective category.

| BeCrop® index category | BeCrop® index                  | Description                                                                                                                                                                         |
|------------------------|--------------------------------|-------------------------------------------------------------------------------------------------------------------------------------------------------------------------------------|
| Soil Quality           | Biodiversity                   | Alpha diversity for both microbial communities                                                                                                                                      |
|                        | Biodiversity (bacteria)        | Alpha diversity for bacteria communities                                                                                                                                            |
|                        | Biodiversity (fungi)           | Alpha diversity for fungi communities                                                                                                                                               |
|                        | Functional diversity           | Amount of different ecological roles performed in soil by the microbial community                                                                                                   |
|                        | Resilience                     | Measure of cluster structure of the active community, with dense and unclustered networks (high resistance score) indicating a broad ability to respond to environmental challenges |
|                        | Soil Quality Index             | Bioindicator based on soil microbiome ecology that changes based on agriculture management intensification                                                                          |
| Hormones Impact        | Auxin production (IAA)         | Responsible for cell division and elongation                                                                                                                                        |
|                        | Cytokinin production (CK)      | Responsible for cell proliferation and differentiation                                                                                                                              |
|                        | Gibberellin production (GA)    | Responsible for elongation, germination and flowering                                                                                                                               |
| Stress Impact          | Absciscic acid (ABA)           | Growth regulation, Plant resistance                                                                                                                                                 |
|                        | ACC deaminase (ACC-d)          | Pathogen protection. Drought protection                                                                                                                                             |
|                        | Exopolysaccharide production   | Nutrient trap, Salinity protection                                                                                                                                                  |
|                        | Heavy metal solubilization     | Bioremediation, Detoxification                                                                                                                                                      |
|                        | Salicylic acid (SA)            | Alleviate water stress, Salinity protection                                                                                                                                         |
|                        | Salt tolerance                 | Alleviate water stress, Root Growth                                                                                                                                                 |
|                        | Siderophore production         | Iron nutrition, Biofertilization                                                                                                                                                    |
| Biocontrol Impact      | Bactericide agents             | Microbial species capable of preventing pathogenic species from taking hold or proliferating                                                                                        |
|                        | Fungicide agents               |                                                                                                                                                                                     |
|                        | Insecticide agents             |                                                                                                                                                                                     |
|                        | Nematicide agents              |                                                                                                                                                                                     |
| Nitrogen Metabolism    | Nitrogen                       | Summary of nitrogen indexes. Nitrogen plays a fundamental role in crop yield                                                                                                        |
|                        | Inorganic nitrogen consumption | Uptake of nitrogen by plants and microbes                                                                                                                                           |

|                          |                                 |                                                                                                                                                                                           |
|--------------------------|---------------------------------|-------------------------------------------------------------------------------------------------------------------------------------------------------------------------------------------|
|                          | Inorganic nitrogen release      | Process of mineralization, microbial transformation of organic Nitrogen compounds to inorganic that serve as plant nutrients                                                              |
|                          | Nitrogen cycle                  | Steps of nitrogen cycles: ammonification, nitrification, denitrification and anaerobic ammonia oxidation                                                                                  |
| Phosphorus Metabolism    | Phosphorus                      | Summary of Phosphorus indexes. Nutrient required for the regulation of protein synthesis and plant growth                                                                                 |
|                          | Inorganic P consumption         | Uptake of Phosphorus by plants and microbes                                                                                                                                               |
|                          | Inorganic P solubilization      | Microbes can convert insoluble phosphorus in the soil into available forms that plant can absorb                                                                                          |
|                          | Organic P assimilation          | Intermediate step of phosphorus cycle to pass from organic to inorganic forms                                                                                                             |
| Potassium Metabolism     | Potassium                       | Summary of potassium indexes. Potassium is involved in the regulation of several microbial activities, such as the production of sugars and proteins involved in crop evapotranspiration. |
|                          | Potassium consumption           | Potassium uptake by plants and microbes                                                                                                                                                   |
|                          | Potassium solubilization        | Process of dissolving insoluble potassium in the soil into available forms for plants                                                                                                     |
| Carbon Metabolism        | Carbon                          | Summary of carbon indexes. Carbon play an important role in soil fertility                                                                                                                |
|                          | Aerobic respiration             | Process in which microbes use organic compounds in oxygenated conditions, releasing CO <sub>2</sub>                                                                                       |
|                          | Carbon fixation                 | what microbes need to grow                                                                                                                                                                |
|                          | Fermentation                    | Process in which microbes gain energy from organic compounds in non-oxygenated conditions, releasing CO <sub>2</sub>                                                                      |
|                          | Organic matter release          | Process in which soil microorganisms decompose vegetal debris, releasing diverse mineral nutrients.                                                                                       |
|                          | Methanogenesis                  | The formation of Methane (CH <sub>4</sub> ) by microbes                                                                                                                                   |
| Micronutrient Metabolism | Calcium transport               | Contributes to soil fertility                                                                                                                                                             |
|                          | Chlorine transport              | Important micronutrient that takes part in processes such as disease resistance and tolerance                                                                                             |
|                          | Copper export                   | Potential toxic micronutrient                                                                                                                                                             |
|                          | Iron assimilation               | Crucial for enzymatic activities such as nitrogen fixation                                                                                                                                |
|                          | Magnesium transport             | Nutrient involved in enzyme activities and structural stabilization of tissue                                                                                                             |
|                          | Manganese transport equilibrium | Involved in photosynthesis respiration and nitrogen assimilation                                                                                                                          |

|          |                                     |                                                            |
|----------|-------------------------------------|------------------------------------------------------------|
|          | Sulfur cycle equilibrium            | Essential nutrient to maintain good health and high yields |
|          | Zinc transport equilibrium          | Zinc transport equilibrium. Crucial for plant development  |
| Diseases | <i>All major and minor diseases</i> | Level of risk of specific crop pathogens                   |
