# Supplementary material for: Physicochemical Properties and Microbiome of Vineyard Soils from DOP Ribeiro (NW Spain) Are Influenced by Agricultural Management
Source: MDPI journal article supplement (doi:10.3390/microorganisms12030595), 2024-03-16
Supplement: s1 [file s1]

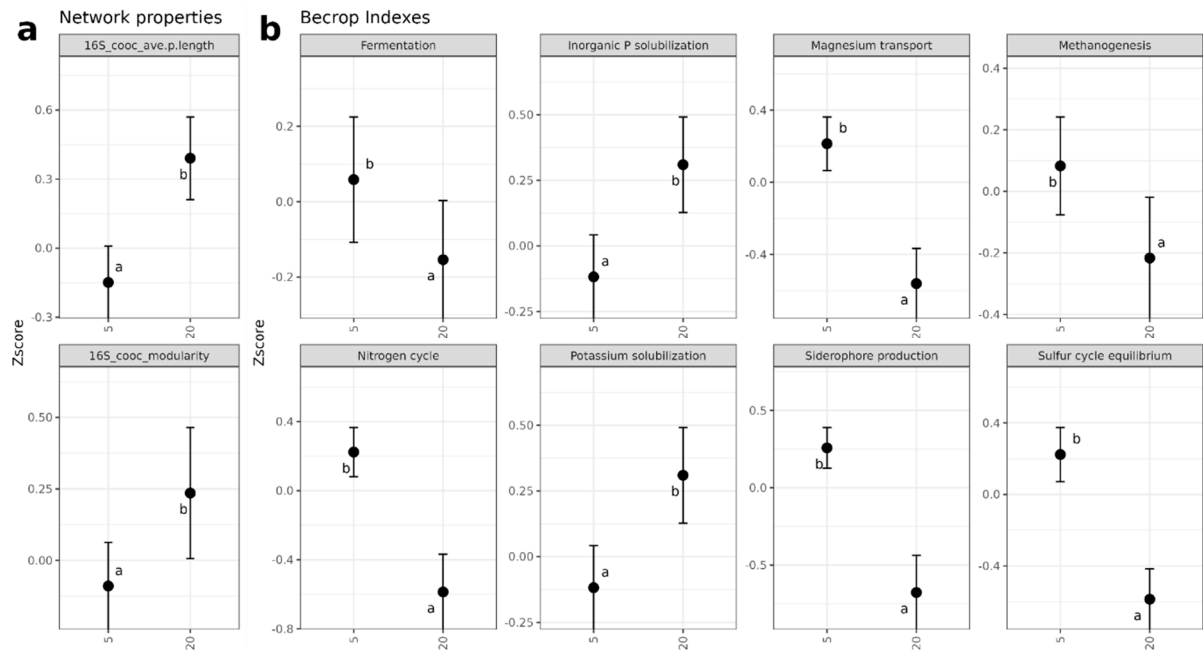

**Figure S4** Network properties (panel a) and microbiome BeCrop® indexes (panel b) factorial plots depending on depth level. Superscript letters indicate statistically different groups (adj. p-value < 0.05).
