# Supplementary material for: Physicochemical Properties and Microbiome of Vineyard Soils from DOP Ribeiro (NW Spain) Are Influenced by Agricultural Management
Source: Microorganisms. 2024 Mar 16;12(3):595. doi: 10.3390/microorganisms12030595 (PMC10974217; doi:10.3390/microorganisms12030595)
Supplement: Supplementary file 1 [file microorganisms-12-00595-s001.zip]

Archive with 7 entries (7 files):
- Figure S4 Network properties.pdf
- Supplementary material-FQ soils.pdf
- Table S3.xlsx
- Table S4-Global recoveries.xlsx
- Table S5-BeCrop Indexes.pdf
- Table S6. Fungicide concentration in soils. xlsx.xlsx
- Table S7 and Table S8.xlsx
