# Supplementary material for: Physicochemical Properties and Microbiome of Vineyard Soils from DOP Ribeiro (NW Spain) Are Influenced by Agricultural Management
Source: Microorganisms. 2024 Mar 16;12(3):595. doi: 10.3390/microorganisms12030595 (PMC10974217; doi:10.3390/microorganisms12030595)
Supplement: Supplementary file 1 [file microorganisms-12-00595-s001.zip › Table S3.xlsx]

## Sheet: Hoja1
	Table S3. Retention times and MRM conditions of native pesticides and selected surrogate standards.
	Compound	Precursor ion (m/z)	Cone voltage (V)	Q1, m/z (EC, eV)	Q2 m/z (EC, eV)	Ratio	Tr (min)	SS
						Q2/Q1
	Acetamiprid	223	34	126 (20)	56 (15)	0,62	2.28	Acetamiprid-d3
	Ametoctradin	276	60	176 (35)	70 (50)	0,19	3,63	Myclobutanil-d4
	Azoxystrobin	404	28	372 (15)	329 (30)	0,23	3.65	Myclobutanil-d4
	Benalaxyl	326	26	148 (20)	91 (34)	0,74	4,82	Metalaxyl 13C6
	Boscalid	343	41	140 (20)	307 (20)	0.81	3.73	Boscalid-d4
	Carbendazim	192	33	160 (18)	132 (28)	0,18	1,92	Carbendazim-d3
	Chlorantraniliprole	484	18	286 (12)	453 (17)	0,75	3,18	Myclobutanil-d4
	Chlorpyrifos	350	36	97 (32)	198 (20)	0,56	5.84	Myclobutanil-d4
	Chlorpyrifos-methyl	322	34	125 (20)	290 (16)	0,25	5,13	Myclobutanil-d4
	Clofentezine	303	28	138 (22)	102 (35)	0,79	5,16	Metalaxyl 13C6
	Clothianidin	250	24	169 (22)	132 (18)	0,57	2.18	Clothianidin-d3
	Cyflufenamid	413	36	295 (15)	203 (35)	0,58	5,36	Metalaxyl 13C6
	Cymoxanil	199	23	128 (8)	111 (18)	0.5	2.36	Metalaxyl 13C6
	Cyproconazole	292	35	70 (15)	125 (25)	0,30	3.35	Metalaxyl 13C6
	Cyprodinil	226	56	93 (33)	108 (25)	0,71	3.05	Cyprodinil-d5
	Difenoconazole	406	46	251 (25)	111 (60)	0,39	4,76	Myclobutanil-d4
	Dimethomorph	388	40	301 (20)	165 (30)	0,65;0,58	3,17;3,28	Dimethomorph-d6
	Fenamidone	312	31	92 (25)	236 (14)	0,47	3.65	Metalaxyl 13C6
	Fenhexamid	302	41	97 (22)	55 (38)	0,29	3.73	Fenhexamid-d3
	*Fludioxonil	247	50	180 (28)	126 (35)	0.73	3.4	Metalaxyl 13C6
	Fluopicolid	383	40	173 (20)	365 (15)	0,09	4,16	Myclobutanil-d4
	Imidacloprid	256	34	209 (15)	175 (20)	1,03	2,23	Imidacloprid-d4
	Iprovalicarb	321	28	119 (16)	203 (10)	0,37	3,76	Metalaxyl 13C6
	Mandipropamid	412	25	328 (16)	125 (35)	0,69	3.83	Metalaxyl 13C6
	CGA 62826	266	25	220 (15)	192 (15)	0,54	2.51	Metalaxyl 13C6
	Metalaxyl	280	26	220 (13)	192 (17)	0,57	2,87	Metalaxyl 13C6
	Methiocarb	226	28	169 (10)	121 (22)	0,71	3.31	Metalaxyl 13C6
	Methoxyfenozide	369	20	149 (20)	313 (8)	0,09	4,06	Metalaxyl 13C6
	Metrafenonone	490	28	209 (14)	227 (16)	0,47	5,29	Metalaxyl 13C6
	Myclobutanil	289	34	70 (18)	125 (32)	0,26	3.59	Myclobutanil-d4
	Penconazole	284	34	70 (16)	159 (34)	0,32	4,29	Myclobutanil-d4
	Propiconazole	342	46	69 (22)	159 (34)	0,54	4,53	Myclobutanil-d4
	Pyraclostrobin	388	31	194 (12)	163 (25)	0,65	5.02	Myclobutanil-d4
	Pyrimethanil	200	51	82 (24)	107 (24)	1,42	2.65	Pyrimethanil-d5
	Quinoxyfen	308	61	197 (32)	162 (44)	0,69	5,38	Myclobutanil-d4
	Tebuconazole	208	40	70 (22)	125 (40)	0.08	3.6	Tebuconazole-d9
	Tebufenozide	353	19	133 (20)	297 (8)	0,64	4,75	Tebuconazole-d9
	Tetraconazole	372	41	159 (30)	70 (20)	0,92	3.86	Tebuconazole-d9
	Thiamethoxam	292	28	211 (12)	132 (22)	0,71	2.08	Thiamethoxam-d4
	Thiophanate methyl	343	28	151 (46)	93 (19)	0,01	2.59	Metalaxyl 13C6
	Triadimefon	294	31	69 (20)	197 (15)	0,82	3,92	Myclobutanil-d4
	Triadimenol	296	21	70 (10)	99 (15)	0,10	3,37	Myclobutanil-d4
	Trifloxystrobin	409	34	186 (16)	145 40)	0,46	5,41	Myclobutanil-d4
	Zoxamide	336	38	187 (25)	159 (38)	0,49	5,02	Myclobutanil-d4
	Acetamiprid-d3	226	34	126 (20)	56 (15)	0,99	2.28
	Boscalid-d4	347	41	140 (20)	311 (20)	0,71	3.73
	Carbendazim-d3	195	33	160 (18)	132 (33)	0.16	1,92
	Clothianidin-d3	253	20	172 (10)	132 (15)	0,64	2.18
	Cyprodinil-d5	231	56	93 (33)	108 (25)	0,45	3.05
	Dimethomorph-d6	394	40	307 (20)	171 (30)	0,55	3,17;3,28
	Fenhexamid-d3	305	50	100 (20)	55 (30)	0,11	3.73
	Fluopyram-d4	401	20	177 (30)	208 (20)	0,90	4,23
	Imidacloprid-d4	260	34	213 (15)	179 (20)	1,2	2,23
	Metalaxyl 13C6	286	26	226 (13)	198 (17)	0,59	2,87
	Myclobutanil-d4	293	34	70 (18)	129 (32)	0.19	3.59
	Pyrimethanil-d5	205	51	107 (24)	82 (24)	0,80	2.65
	Tebuconazole-d9	317	40	70 (22)	125 (40)	0,07	3.6
	Thiamethoxam-d4	296	20	215 (10)	132 (20)	0,55	2.08
	Thiophanate methyl-d6	349	21	151 (20)	93 (50)	0,13	2.59
	*ESI (-)
	Quitalmos cymoxanild3? No se ve
