# Supplementary material for: Physicochemical Properties and Microbiome of Vineyard Soils from DOP Ribeiro (NW Spain) Are Influenced by Agricultural Management
Source: Microorganisms. 2024 Mar 16;12(3):595. doi: 10.3390/microorganisms12030595 (PMC10974217; doi:10.3390/microorganisms12030595)
Supplement: Supplementary file 1 [file microorganisms-12-00595-s001.zip › Table S4-Global recoveries.xlsx]

## Sheet: Hoja1
	Table S4. Global recoveries of the analytical procedure in two different vineyard soils spiked at two concentration levels referred to freeze-dried soil. Data for samples spiked at 50 ng g-1 (n= 6 replicates)
	Compound	Global recovery (%) with SD
	Acetamiprid	81 (16)
	Ametoctradin	91 (3)
	Azoxystrobin	129 (5)
	Benalaxyl	117 (6)
	Boscalid	106 (9)
	Carbendazim	90 (18)
	Chlorantraniliprole	100 (15)
	Chlorpyrifos	80 (6)
	Chlorpyrifos-methyl	92 (12)
	Clofentezine	87 (8)
	Clothianidin	93 (5)
	Cyflufenamid	95 (13)
	Cymoxanil	68 (19)
	Cyproconazole	99 (10)
	Cyprodinil	112 (7)
	Difenoconazole	109 (7)
	Dimethomorph	127 (24)
	Fenamidone	90 (10)
	Fenhexamid	104 (7)
	*Fludioxonil	97(12)
	Fluopicolid	113(5)
	Imidacloprid	119(10)
	Iprovalicarb	115 (4)
	Mandipropamid	136 (16)
	CGA 62826	127 (12)
	Metalaxyl	110 (4)
	Methiocarb	70 (12)
	Methoxyfenozide	95 (14)
	Metrafenonone	117 (14)
	Myclobutanil	99 (3)
	Penconazole	107 (8)
	Propiconazole	110 (10)
	Pyraclostrobin	114 (3)
	Pyrimethanil	111 (7)
	Quinoxyfen	81 (5)
	Tebuconazole	108 (8)
	Tebufenozide	117 (5)
	Tetraconazole	110 (4)
	Thiamethoxam	91 (9)
	Thiophanate methyl	71 (14)
	Triadimefon	104 (4)
	Triadimenol	107 (12)
	Trifloxystrobin	101 (6)
	Zoxamide	102 (7)
