# Supplementary material for: Physicochemical Properties and Microbiome of Vineyard Soils from DOP Ribeiro (NW Spain) Are Influenced by Agricultural Management
Source: Microorganisms. 2024 Mar 16;12(3):595. doi: 10.3390/microorganisms12030595 (PMC10974217; doi:10.3390/microorganisms12030595)
Supplement: Supplementary file 1 [file microorganisms-12-00595-s001.zip › Table S6. Fungicide concentration in soils. xlsx.xlsx]

## Sheet: Datos reducidos
Table S6. Summary of concentrations for pesticides in transition and conventional managed vineyards
Code	Management	Acetamiprid	Ametoctradin	Azoxystrobin	Boscalid	Carbendazim	Cyflufenamid	Cymoxanil	Cyprodinil	Difenoconazole	Dimethomorph	Fludioxonil	Fluopicolid	Iprovalicarb	Mandipropamid	Metalaxyl	CGA 62826	Methozyfenozide	Myclobutanil	Penconazole	Pyrimethanil	Tebuconazole	Tetraconazole	Triadimenol	Trifloxystrobin	Zoxamide	Sum (ng g-1)
22-S6-5	Transition				69.375	15.25					24.9375		45.875			4.125			20.5	7.375		15.625					203.062
22-S6-20	Transition				18.375	18.125					5.1875		9			2.875			1.625			1.625					56.8125
23-S6-5	Transition				44.75	31.25					7.375											2.5					85.875
23-S6-20	Transition				10.5	30					3.125																43.625
22-S7-5	Transition		32.5		94.25	22.875					20.0625		50.5			4.25			17.875	4.125		12.125					258.562
22-S7-20	Transition			0.625	9.75	26.75					6.5		14.625			3											61.25
23-S7-5	Transition				17.5						10											6					33.5
23-S7-20	Transition				15						8.75											0.75					24.5
22-S8-5	Transition			3.5	9.6						51.1				32.2	27.7			127.2							13.2	264.5
22-S8-20	Transition				12.1						7.9				6.1	6.3			16.9							3	52.3
23-S8-5	Transition				10						20				6.9	6.5			92.8							2.5	138.7
23-S8-20	Transition				9.1						4					4.6			14								31.7
22-S9-5	Transition					7.625			85.9		3.375	46.375				8.875			218.125	1.5							371.775
22-S9-20	Transition					11.125			36.625		3.625	27.125				6.125			158.5								243.125
23-S9-5	Transition								90.5			72.5							205.75								368.75
23-S9-20	Transition					29.25			17.25										42								88.5
22-S10-5	Conventional				3.1	12.125	4.875	15.625	10	22.75	5.875				160.625	33.5			117.5			41.875				53.875	481.725
22-S10-20	Conventional					12.25			18.625	3.25	4.3125				5.125	7.25			7			6.125				12.75	76.6875
23-S10-5	Conventional									14.25					56.25				64.5			17				3.5	155.5
23-S10-20	Conventional									2.75					15.75				24.5			3.75				1.25	48
22-S11-5	Conventional			6.5			15.875	17		42.75	16.6875				45.25	64.5	14.125		54.5	8.375		146.625				51.625	483.812
22-S11-20	Conventional									1.875	3.1875				3.5	10			6.375			10.875					35.8125
23-S11-5	Conventional			3.75						21.25	14				21				30.75	4.25		88.5					183.5
23-S11-20	Conventional									3	6								7			15					31
22-S12-5	Conventional			92.875	9.125	95.5		6.25	6		115					20.625			105.25			166					616.625
22-S12-20	Conventional			16	4.125	65.125					35.4375					8.125			17.5			29.5					175.812
23-S12-5	Conventional			30.5	3.75	57.5					58.625					6.25			53.75			76.25					286.625
23-S12-20	Conventional			5	8	81.25					15.875								10.25			11					131.375
22-S13-5	Conventional			2.25	8	62.875			35.125		193.5					42.875			110.625		3.75	175.875					634.875
22-S13-20	Conventional			23.25	2.75	43			8.125		98.5625					7.125			41.375			60.25					284.438
23-S13-5	Conventional			10.25	8.75	48.75			17.75		77.875					3			74.75		8.75	59.75					309.625
23-S13-20	Conventional			1.75	9.5	73.75			5		34.875								14		6.25	9.25					154.375
22-S14-5	Conventional		4.125	98.75	111	37.875		5.75	51	23	115.25	43.375	162.75	8.125	67.25	38.875	10	16.625	87.25	53.875		184.625	12.25	9.375	5.875	107.875	1254.88
22-S14-20	Conventional			9.25	16.25	28.375			4	1.125	30.625		24.5		7.5	9.375		4.75	14.25	4.75		20.875				9.625	185.25
23-S14-5	Conventional			17	59	37			11.75	2.75	36.625	48.75	46.25		49.5	8.75			57	21.75		59	3.75			5.25	464.125
23-S14-20	Conventional			3.25	11.25								15						11	4.25		10					54.75
22-S15-5	Conventional	61.125		9.25		10.5		4.875	149	36.375	92.75					842	205.875		430			71.5	16.25			3.125	1932.62
22-S15-20	Conventional			2.375		27			30.875		63.875					28.25	12		77			11	3.375				255.75
23-S15-5	Conventional			2.5		30			30.25		32.75					34.75	9.25		79.75			14.25	2.5				236
23-S15-20	Conventional					37.5			13		8.625					11.5	3.75		16.75			1.75					92.875
	LOQ (ng g-1)	2.5	2.5	0.5	3	5	3	4	2.5	1	2	10	2.5	2.5	2.5	2.5	2.5	2.5	1.5	1.5	2	0.8	2	2	2	1
