# Supplementary material for: Physicochemical Properties and Microbiome of Vineyard Soils from DOP Ribeiro (NW Spain) Are Influenced by Agricultural Management
Source: Microorganisms. 2024 Mar 16;12(3):595. doi: 10.3390/microorganisms12030595 (PMC10974217; doi:10.3390/microorganisms12030595)
Supplement: Supplementary file 1 [file microorganisms-12-00595-s001.zip › Table S7 and Table S8.xlsx]

## Sheet: Table S7
condition	taxa	marker
ecologic	Candidatus Nitrosocosmicus	16S
ecologic	Candidatus Nitrososphaera	16S
ecologic	Abditibacterium	16S
ecologic	Acidipila-Silvibacterium	16S
ecologic	Edaphobacter	16S
ecologic	Granulicella	16S
ecologic	Occallatibacter	16S				Table S7
ecologic	Candidatus Koribacter	16S
ecologic	Bryobacter	16S
ecologic	Candidatus Solibacter	16S
ecologic	Aridibacter	16S
ecologic	Blastocatella	16S
ecologic	Stenotrophobacter	16S
ecologic	Tellurimicrobium	16S
ecologic	RB41	16S
ecologic	Luteitalea	16S
ecologic	Vicinamibacter	16S
ecologic	Iamia	16S
ecologic	CL500-29 marine group	16S
ecologic	Ilumatobacter	16S
ecologic	Catenulispora	16S
ecologic	Mycobacterium	16S
ecologic	Nocardia	16S
ecologic	Rhodococcus	16S
ecologic	Smaragdicoccus	16S
ecologic	Acidothermus	16S
ecologic	Jatrophihabitans	16S
ecologic	Blastococcus	16S
ecologic	Geodermatophilus	16S
ecologic	Modestobacter	16S
ecologic	Nakamurella	16S
ecologic	Sporichthya	16S
ecologic	Angustibacter	16S
ecologic	Kineosporia	16S
ecologic	Cellulomonas	16S
ecologic	Janibacter	16S
ecologic	Lapillicoccus	16S
ecologic	Oryzihumus	16S
ecologic	Pedococcus-Phycicoccus	16S
ecologic	Terrabacter	16S
ecologic	Agromyces	16S
ecologic	Leifsonia	16S
ecologic	Microbacterium	16S
ecologic	Microterricola	16S
ecologic	Arthrobacter	16S
ecologic	Paenarthrobacter	16S
ecologic	Pseudarthrobacter	16S
ecologic	Actinocatenispora	16S
ecologic	Actinoplanes	16S
ecologic	Allocatelliglobosispora	16S
ecologic	Asanoa	16S
ecologic	Catellatospora	16S
ecologic	Dactylosporangium	16S
ecologic	Longispora	16S
ecologic	Luedemannella	16S
ecologic	Micromonospora	16S
ecologic	Rugosimonospora	16S
ecologic	Aeromicrobium	16S
ecologic	Kribbella	16S
ecologic	Marmoricola	16S
ecologic	Nocardioides	16S
ecologic	Friedmanniella	16S
ecologic	Microlunatus	16S
ecologic	Actinomycetospora	16S
ecologic	Actinophytocola	16S
ecologic	Amycolatopsis	16S
ecologic	Crossiella	16S
ecologic	Kutzneria	16S
ecologic	Lechevalieria	16S
ecologic	Pseudonocardia	16S
ecologic	Kitasatospora	16S
ecologic	Streptacidiphilus	16S
ecologic	Streptomyces	16S
ecologic	Nonomuraea	16S
ecologic	Sphaerisporangium	16S
ecologic	Streptosporangium	16S
ecologic	Motilibacter	16S
ecologic	Actinoallomurus	16S
ecologic	Actinocorallia	16S
ecologic	Actinomadura	16S
ecologic	Rubrobacter	16S
ecologic	Gaiella	16S
ecologic	Conexibacter	16S
ecologic	Parviterribacter	16S
ecologic	Solirubrobacter	16S
ecologic	Chthonomonas	16S
ecologic	Aurantisolimonas	16S
ecologic	Chitinophaga	16S
ecologic	Dinghuibacter	16S
ecologic	Edaphobaculum	16S
ecologic	Ferruginibacter	16S
ecologic	Flavihumibacter	16S
ecologic	Flavisolibacter	16S
ecologic	Flavitalea	16S
ecologic	Niastella	16S
ecologic	Parafilimonas	16S
ecologic	Parasegetibacter	16S
ecologic	Puia	16S
ecologic	Sediminibacterium	16S
ecologic	Segetibacter	16S
ecologic	Terrimonas	16S
ecologic	Cytophaga	16S
ecologic	Adhaeribacter	16S
ecologic	Chryseolinea	16S
ecologic	Hassallia	16S
ecologic	Ohtaekwangia	16S
ecologic	Dyadobacter	16S
ecologic	Flavobacterium	16S
ecologic	Mucilaginibacter	16S
ecologic	Pedobacter	16S
ecologic	Peredibacter	16S
ecologic	Bdellovibrio	16S
ecologic	Oligoflexus	16S
ecologic	Ktedonobacter	16S
ecologic	Tumebacillus	16S
ecologic	Bacillus	16S
ecologic	Neobacillus	16S
ecologic	Lysinibacillus	16S
ecologic	Planococcus	16S
ecologic	Sporosarcina	16S
ecologic	Cohnella	16S
ecologic	Paenibacillus	16S
ecologic	Shimazuella	16S
ecologic	Clostridium sensu stricto 1	16S
ecologic	Clostridium sensu stricto 13	16S
ecologic	Romboutsia	16S
ecologic	Gemmatimonas	16S
ecologic	Gemmatirosa	16S
ecologic	Anaeromyxobacter	16S
ecologic	Aggregicoccus	16S
ecologic	Corallococcus	16S
ecologic	Cystobacter	16S
ecologic	Stigmatella	16S
ecologic	Vulgatibacter	16S
ecologic	Haliangium	16S
ecologic	Nannocystis	16S
ecologic	Phaselicystis	16S
ecologic	Aetherobacter	16S
ecologic	Pajaroellobacter	16S
ecologic	Polyangium	16S
ecologic	Sorangium	16S
ecologic	Sandaracinus	16S
ecologic	Nitrospira	16S
ecologic	Fimbriiglobus	16S
ecologic	Gemmata	16S
ecologic	Aquisphaera	16S
ecologic	Candidatus Nostocoida	16S
ecologic	Paludisphaera	16S
ecologic	Singulisphaera	16S
ecologic	Tundrisphaera	16S
ecologic	Pirellula	16S
ecologic	Rhodopirellula	16S
ecologic	Acidicaldus	16S
ecologic	Acidiphilium	16S
ecologic	Belnapia	16S
ecologic	Rhodopila	16S
ecologic	Rhodovastum	16S
ecologic	Roseomonas	16S
ecologic	Nitrospirillum	16S
ecologic	Skermanella	16S
ecologic	Inquilinus	16S
ecologic	Asticcacaulis	16S
ecologic	Brevundimonas	16S
ecologic	Caulobacter	16S
ecologic	Phenylobacterium	16S
ecologic	Hirschia	16S
ecologic	Dongia	16S
ecologic	Reyranella	16S
ecologic	Bosea	16S
ecologic	Methylobacterium-Methylorubrum	16S
ecologic	Methylocapsa	16S
ecologic	Methylorosula	16S
ecologic	Microvirga	16S
ecologic	Psychroglaciecola	16S
ecologic	Roseiarcus	16S
ecologic	Devosia	16S
ecologic	Hyphomicrobium	16S
ecologic	Pedomicrobium	16S
ecologic	Labrys	16S
ecologic	Allorhizobium-Neorhizobium-Pararhizobium-Rhizobium	16S
ecologic	Mesorhizobium	16S
ecologic	Phyllobacterium	16S
ecologic	Alsobacter	16S
ecologic	Bauldia	16S
ecologic	Nordella	16S
ecologic	Bradyrhizobium	16S
ecologic	Pseudolabrys	16S
ecologic	Pseudorhodoplanes	16S
ecologic	Rhodoplanes	16S
ecologic	Tardiphaga	16S
ecologic	Amaricoccus	16S
ecologic	Altererythrobacter	16S
ecologic	Novosphingobium	16S
ecologic	Sphingobium	16S
ecologic	Sphingomonas	16S
ecologic	Sphingosinicella	16S
ecologic	Candidatus Alysiosphaera	16S
ecologic	Geminicoccus	16S
ecologic	Burkholderia-Caballeronia-Paraburkholderia	16S
ecologic	Cupriavidus	16S
ecologic	Acidovorax	16S
ecologic	Caenimonas	16S
ecologic	Comamonas	16S
ecologic	Ideonella	16S
ecologic	Leptothrix	16S
ecologic	Ramlibacter	16S
ecologic	Rhizobacter	16S
ecologic	Rhodoferax	16S
ecologic	Variovorax	16S
ecologic	Methylobacillus	16S
ecologic	Nitrosospira	16S
ecologic	Duganella	16S
ecologic	Herminiimonas	16S
ecologic	Massilia	16S
ecologic	Noviherbaspirillum	16S
ecologic	Aquicella	16S
ecologic	Acidibacter	16S
ecologic	Candidatus Ovatusbacter	16S
ecologic	Legionella	16S
ecologic	Luminiphilus	16S
ecologic	Pseudomonas	16S
ecologic	Povalibacter	16S
ecologic	Steroidobacter	16S
ecologic	Ahniella	16S
ecologic	Dokdonella	16S
ecologic	Dyella	16S
ecologic	Luteibacter	16S
ecologic	Rhodanobacter	16S
ecologic	Tahibacter	16S
ecologic	Arenimonas	16S
ecologic	Luteimonas	16S
ecologic	Lysobacter	16S
ecologic	Stenotrophomonas	16S
ecologic	Sumerlaea	16S
ecologic	Candidatus Udaeobacter	16S
ecologic	Chthoniobacter	16S
ecologic	Candidatus Xiphinematobacter	16S
ecologic	Lacunisphaera	16S
ecologic	Opitutus	16S
ecologic	Pedosphaera	16S
ecologic	Luteolibacter	16S
ecologic	Roseimicrobium	16S
conventional	Candidatus Nitrosocosmicus	16S
conventional	Candidatus Nitrososphaera	16S
conventional	Abditibacterium	16S
conventional	Acidipila-Silvibacterium	16S
conventional	Edaphobacter	16S
conventional	Granulicella	16S
conventional	Occallatibacter	16S
conventional	Terracidiphilus	16S
conventional	Candidatus Koribacter	16S
conventional	Bryobacter	16S
conventional	Candidatus Solibacter	16S
conventional	Stenotrophobacter	16S
conventional	Luteitalea	16S
conventional	Iamia	16S
conventional	CL500-29 marine group	16S
conventional	Ilumatobacter	16S
conventional	Actinospica	16S
conventional	Catenulispora	16S
conventional	Mycobacterium	16S
conventional	Nocardia	16S
conventional	Rhodococcus	16S
conventional	Williamsia	16S
conventional	Acidothermus	16S
conventional	Frankia	16S
conventional	Jatrophihabitans	16S
conventional	Blastococcus	16S
conventional	Geodermatophilus	16S
conventional	Modestobacter	16S
conventional	Nakamurella	16S
conventional	Angustibacter	16S
conventional	Kineosporia	16S
conventional	Cellulomonas	16S
conventional	Janibacter	16S
conventional	Oryzihumus	16S
conventional	Pedococcus-Phycicoccus	16S
conventional	Terrabacter	16S
conventional	Leifsonia	16S
conventional	Microbacterium	16S
conventional	Yonghaparkia	16S
conventional	Arthrobacter	16S
conventional	Paenarthrobacter	16S
conventional	Pseudarthrobacter	16S
conventional	Sinomonas	16S
conventional	Actinocatenispora	16S
conventional	Actinoplanes	16S
conventional	Dactylosporangium	16S
conventional	Hamadaea	16S
conventional	Luedemannella	16S
conventional	Micromonospora	16S
conventional	Aeromicrobium	16S
conventional	Kribbella	16S
conventional	Marmoricola	16S
conventional	Nocardioides	16S
conventional	Microlunatus	16S
conventional	Actinomycetospora	16S
conventional	Actinophytocola	16S
conventional	Amycolatopsis	16S
conventional	Crossiella	16S
conventional	Pseudonocardia	16S
conventional	Kitasatospora	16S
conventional	Streptomyces	16S
conventional	Nonomuraea	16S
conventional	Streptosporangium	16S
conventional	Motilibacter	16S
conventional	Actinoallomurus	16S
conventional	Actinomadura	16S
conventional	Rubrobacter	16S
conventional	Gaiella	16S
conventional	Conexibacter	16S
conventional	Solirubrobacter	16S
conventional	Chthonomonas	16S
conventional	Aurantisolimonas	16S
conventional	Chitinophaga	16S
conventional	Edaphobaculum	16S
conventional	Ferruginibacter	16S
conventional	Flavihumibacter	16S
conventional	Flavisolibacter	16S
conventional	Flavitalea	16S
conventional	Niastella	16S
conventional	Parafilimonas	16S
conventional	Parasegetibacter	16S
conventional	Puia	16S
conventional	Sediminibacterium	16S
conventional	Segetibacter	16S
conventional	Terrimonas	16S
conventional	Chryseolinea	16S
conventional	Ohtaekwangia	16S
conventional	Flavobacterium	16S
conventional	Mucilaginibacter	16S
conventional	Pedobacter	16S
conventional	Peredibacter	16S
conventional	Bdellovibrio	16S
conventional	Tumebacillus	16S
conventional	Bacillus	16S
conventional	Neobacillus	16S
conventional	Lysinibacillus	16S
conventional	Planococcus	16S
conventional	Psychrobacillus	16S
conventional	Pullulanibacillus	16S
conventional	Turicibacter	16S
conventional	Cohnella	16S
conventional	Paenibacillus	16S
conventional	Novibacillus	16S
conventional	Planifilum	16S
conventional	Shimazuella	16S
conventional	Clostridium sensu stricto 1	16S
conventional	Clostridium sensu stricto 13	16S
conventional	Romboutsia	16S
conventional	Gemmatimonas	16S
conventional	Gemmatirosa	16S
conventional	Anaeromyxobacter	16S
conventional	Aggregicoccus	16S
conventional	Cystobacter	16S
conventional	Stigmatella	16S
conventional	Vulgatibacter	16S
conventional	Haliangium	16S
conventional	Nannocystis	16S
conventional	Phaselicystis	16S
conventional	Aetherobacter	16S
conventional	Pajaroellobacter	16S
conventional	Sorangium	16S
conventional	Nitrospira	16S
conventional	Fimbriiglobus	16S
conventional	Gemmata	16S
conventional	Aquisphaera	16S
conventional	Candidatus Nostocoida	16S
conventional	Isosphaera	16S
conventional	Paludisphaera	16S
conventional	Singulisphaera	16S
conventional	Tundrisphaera	16S
conventional	Pirellula	16S
conventional	Acidicaldus	16S
conventional	Acidiphilium	16S
conventional	Belnapia	16S
conventional	Rhodopila	16S
conventional	Rhodovastum	16S
conventional	Roseomonas	16S
conventional	Skermanella	16S
conventional	Inquilinus	16S
conventional	Brevundimonas	16S
conventional	Caulobacter	16S
conventional	Phenylobacterium	16S
conventional	Dongia	16S
conventional	Reyranella	16S
conventional	Bosea	16S
conventional	Methylobacterium-Methylorubrum	16S
conventional	Methylorosula	16S
conventional	Microvirga	16S
conventional	Roseiarcus	16S
conventional	Devosia	16S
conventional	Hyphomicrobium	16S
conventional	Pedomicrobium	16S
conventional	Labrys	16S
conventional	Allorhizobium-Neorhizobium-Pararhizobium-Rhizobium	16S
conventional	Mesorhizobium	16S
conventional	Alsobacter	16S
conventional	Bauldia	16S
conventional	Nordella	16S
conventional	Bradyrhizobium	16S
conventional	Pseudolabrys	16S
conventional	Pseudorhodoplanes	16S
conventional	Rhodoplanes	16S
conventional	Tardiphaga	16S
conventional	Altererythrobacter	16S
conventional	Hephaestia	16S
conventional	Novosphingobium	16S
conventional	Porphyrobacter	16S
conventional	Sphingomonas	16S
conventional	Sphingosinicella	16S
conventional	Candidatus Alysiosphaera	16S
conventional	Geminicoccus	16S
conventional	Burkholderia-Caballeronia-Paraburkholderia	16S
conventional	Acidovorax	16S
conventional	Caenimonas	16S
conventional	Comamonas	16S
conventional	Ideonella	16S
conventional	Leptothrix	16S
conventional	Ramlibacter	16S
conventional	Rhizobacter	16S
conventional	Variovorax	16S
conventional	Xenophilus	16S
conventional	Methylobacillus	16S
conventional	Nitrosospira	16S
conventional	Massilia	16S
conventional	Noviherbaspirillum	16S
conventional	Aquicella	16S
conventional	Acidibacter	16S
conventional	Legionella	16S
conventional	Pseudomonas	16S
conventional	Steroidobacter	16S
conventional	Dokdonella	16S
conventional	Dyella	16S
conventional	Rhodanobacter	16S
conventional	Arenimonas	16S
conventional	Lysobacter	16S
conventional	Candidatus Udaeobacter	16S
conventional	Chthoniobacter	16S
conventional	Lacunisphaera	16S
conventional	Opitutus	16S
conventional	Pedosphaera	16S
conventional	Luteolibacter	16S
transition	Candidatus Nitrosocosmicus	16S
transition	Candidatus Nitrososphaera	16S
transition	Abditibacterium	16S
transition	Edaphobacter	16S
transition	Granulicella	16S
transition	Candidatus Koribacter	16S
transition	Bryobacter	16S
transition	Candidatus Solibacter	16S
transition	Blastocatella	16S
transition	Stenotrophobacter	16S
transition	RB41	16S
transition	Luteitalea	16S
transition	Vicinamibacter	16S
transition	Iamia	16S
transition	CL500-29 marine group	16S
transition	Actinospica	16S
transition	Catenulispora	16S
transition	Mycobacterium	16S
transition	Nocardia	16S
transition	Rhodococcus	16S
transition	Smaragdicoccus	16S
transition	Acidothermus	16S
transition	Jatrophihabitans	16S
transition	Blastococcus	16S
transition	Geodermatophilus	16S
transition	Modestobacter	16S
transition	Nakamurella	16S
transition	Sporichthya	16S
transition	Angustibacter	16S
transition	Kineosporia	16S
transition	Cellulomonas	16S
transition	Janibacter	16S
transition	Lapillicoccus	16S
transition	Oryzihumus	16S
transition	Pedococcus-Phycicoccus	16S
transition	Terrabacter	16S
transition	Leifsonia	16S
transition	Lysinimonas	16S
transition	Microbacterium	16S
transition	Yonghaparkia	16S
transition	Arthrobacter	16S
transition	Paenarthrobacter	16S
transition	Pseudarthrobacter	16S
transition	Actinocatenispora	16S
transition	Actinoplanes	16S
transition	Catellatospora	16S
transition	Dactylosporangium	16S
transition	Luedemannella	16S
transition	Micromonospora	16S
transition	Aeromicrobium	16S
transition	Kribbella	16S
transition	Marmoricola	16S
transition	Nocardioides	16S
transition	Friedmanniella	16S
transition	Actinomycetospora	16S
transition	Actinophytocola	16S
transition	Amycolatopsis	16S
transition	Crossiella	16S
transition	Pseudonocardia	16S
transition	Umezawaea	16S
transition	Kitasatospora	16S
transition	Streptomyces	16S
transition	Nonomuraea	16S
transition	Streptosporangium	16S
transition	Motilibacter	16S
transition	Actinoallomurus	16S
transition	Actinocorallia	16S
transition	Actinomadura	16S
transition	Rubrobacter	16S
transition	Gaiella	16S
transition	Conexibacter	16S
transition	Parviterribacter	16S
transition	Solirubrobacter	16S
transition	Chthonomonas	16S
transition	Chitinophaga	16S
transition	Edaphobaculum	16S
transition	Ferruginibacter	16S
transition	Flavihumibacter	16S
transition	Flavisolibacter	16S
transition	Flavitalea	16S
transition	Niastella	16S
transition	Parafilimonas	16S
transition	Puia	16S
transition	Sediminibacterium	16S
transition	Segetibacter	16S
transition	Terrimonas	16S
transition	Chryseolinea	16S
transition	Hassallia	16S
transition	Ohtaekwangia	16S
transition	Mucilaginibacter	16S
transition	Pedobacter	16S
transition	Bdellovibrio	16S
transition	Vampirovibrio	16S
transition	Tumebacillus	16S
transition	Alkalihalobacillus	16S
transition	Bacillus	16S
transition	Mesobacillus	16S
transition	Neobacillus	16S
transition	Oceanobacillus	16S
transition	Pseudogracilibacillus	16S
transition	Virgibacillus	16S
transition	Lysinibacillus	16S
transition	Planococcus	16S
transition	Psychrobacillus	16S
transition	Turicibacter	16S
transition	Ammoniphilus	16S
transition	Cohnella	16S
transition	Paenibacillus	16S
transition	Novibacillus	16S
transition	Planifilum	16S
transition	Gemmatimonas	16S
transition	Gemmatirosa	16S
transition	Anaeromyxobacter	16S
transition	Aggregicoccus	16S
transition	Stigmatella	16S
transition	Haliangium	16S
transition	Nannocystis	16S
transition	Phaselicystis	16S
transition	Aetherobacter	16S
transition	Minicystis	16S
transition	Pajaroellobacter	16S
transition	Sorangium	16S
transition	Nitrospira	16S
transition	Fimbriiglobus	16S
transition	Gemmata	16S
transition	Aquisphaera	16S
transition	Candidatus Nostocoida	16S
transition	Singulisphaera	16S
transition	Tundrisphaera	16S
transition	Pirellula	16S
transition	Acidicaldus	16S
transition	Acidiphilium	16S
transition	Belnapia	16S
transition	Rhodopila	16S
transition	Roseomonas	16S
transition	Nitrospirillum	16S
transition	Skermanella	16S
transition	Inquilinus	16S
transition	Brevundimonas	16S
transition	Caulobacter	16S
transition	Phenylobacterium	16S
transition	Hirschia	16S
transition	Dongia	16S
transition	Reyranella	16S
transition	Methylobacterium-Methylorubrum	16S
transition	Microvirga	16S
transition	Psychroglaciecola	16S
transition	Roseiarcus	16S
transition	Devosia	16S
transition	Hyphomicrobium	16S
transition	Pedomicrobium	16S
transition	Labrys	16S
transition	Allorhizobium-Neorhizobium-Pararhizobium-Rhizobium	16S
transition	Mesorhizobium	16S
transition	Alsobacter	16S
transition	Bauldia	16S
transition	Nordella	16S
transition	Bradyrhizobium	16S
transition	Pseudolabrys	16S
transition	Pseudorhodoplanes	16S
transition	Rhodoplanes	16S
transition	Rhodopseudomonas	16S
transition	Tardiphaga	16S
transition	Altererythrobacter	16S
transition	Hephaestia	16S
transition	Novosphingobium	16S
transition	Sphingomonas	16S
transition	Sphingosinicella	16S
transition	Candidatus Alysiosphaera	16S
transition	Burkholderia-Caballeronia-Paraburkholderia	16S
transition	Cupriavidus	16S
transition	Acidovorax	16S
transition	Caenimonas	16S
transition	Comamonas	16S
transition	Ideonella	16S
transition	Leptothrix	16S
transition	Ramlibacter	16S
transition	Rhizobacter	16S
transition	Variovorax	16S
transition	Nitrosospira	16S
transition	Duganella	16S
transition	Herminiimonas	16S
transition	Massilia	16S
transition	Noviherbaspirillum	16S
transition	Aquicella	16S
transition	Acidibacter	16S
transition	Legionella	16S
transition	Pseudomonas	16S
transition	Polycyclovorans	16S
transition	Povalibacter	16S
transition	Steroidobacter	16S
transition	Ahniella	16S
transition	Dokdonella	16S
transition	Rhodanobacter	16S
transition	Arenimonas	16S
transition	Lysobacter	16S
transition	Candidatus Udaeobacter	16S
transition	Chthoniobacter	16S
transition	Lacunisphaera	16S
transition	Opitutus	16S
transition	Pedosphaera	16S
transition	Luteolibacter	16S
ecologic	Leptodiscella	ITS
ecologic	Cladosporium	ITS
ecologic	Devriesia	ITS
ecologic	Aureobasidium	ITS
ecologic	Hormonema	ITS
ecologic	Coniothyrium	ITS
ecologic	Pyrenochaeta	ITS
ecologic	Pyrenochaetopsis	ITS
ecologic	Boeremia	ITS
ecologic	Chaetasbolisia	ITS
ecologic	Didymella	ITS
ecologic	Epicoccum	ITS
ecologic	Paraphaeosphaeria	ITS
ecologic	Pseudopithomyces	ITS
ecologic	Leptosphaeria	ITS
ecologic	Lophiostoma	ITS
ecologic	Lophiotrema	ITS
ecologic	Massarina	ITS
ecologic	Periconia	ITS
ecologic	Chaetosphaeronema	ITS
ecologic	Didymocyrtis	ITS
ecologic	Ophiosphaerella	ITS
ecologic	Paraphoma	ITS
ecologic	Phaeosphaeria	ITS
ecologic	Phaeosphaeriopsis	ITS
ecologic	Setophoma	ITS
ecologic	Alternaria	ITS
ecologic	Drechslera	ITS
ecologic	Neopyrenochaeta	ITS
ecologic	Preussia	ITS
ecologic	Dendryphion	ITS
ecologic	Torula	ITS
ecologic	Ochroconis	ITS
ecologic	Cyphellophora	ITS
ecologic	Capronia	ITS
ecologic	Cladophialophora	ITS
ecologic	Exophiala	ITS
ecologic	Phialophora	ITS
ecologic	Knufia	ITS
ecologic	Aspergillus	ITS
ecologic	Penicillium	ITS
ecologic	Sagenomella	ITS
ecologic	Talaromyces	ITS
ecologic	Gymnoascus	ITS
ecologic	Chrysosporium	ITS
ecologic	Pilidium	ITS
ecologic	Mollisia	ITS
ecologic	Articulospora	ITS
ecologic	Bloxamia	ITS
ecologic	Crocicreas	ITS
ecologic	Hymenoscyphus	ITS
ecologic	Scytalidium	ITS
ecologic	Tetracladium	ITS
ecologic	Cistella	ITS
ecologic	Cadophora	ITS
ecologic	Chalara	ITS
ecologic	Xylogone	ITS
ecologic	Oidiodendron	ITS
ecologic	Botrytis	ITS
ecologic	Pseudeurotium	ITS
ecologic	Pseudogymnoascus	ITS
ecologic	Lipomyces	ITS
ecologic	Chloridium	ITS
ecologic	Coniochaeta	ITS
ecologic	Acrostalagmus	ITS
ecologic	Chordomyces	ITS
ecologic	Gibellulopsis	ITS
ecologic	Plectosphaerella	ITS
ecologic	Stachylidium	ITS
ecologic	Clonostachys	ITS
ecologic	Gliomastix	ITS
ecologic	Keithomyces	ITS
ecologic	Metarhizium	ITS
ecologic	Pochonia	ITS
ecologic	Lecanicillium	ITS
ecologic	Monocillium	ITS
ecologic	Trichoderma	ITS
ecologic	Acremonium	ITS
ecologic	Sarocladium	ITS
ecologic	Sesquicillium	ITS
ecologic	Dactylonectria	ITS
ecologic	Fusarium	ITS
ecologic	Fusicolla	ITS
ecologic	Ilyonectria	ITS
ecologic	Thelonectria	ITS
ecologic	Volutella	ITS
ecologic	Purpureocillium	ITS
ecologic	Albifimbria	ITS
ecologic	Cephalotrichum	ITS
ecologic	Myrmecridium	ITS
ecologic	Chaetomium	ITS
ecologic	Dichotomopilus	ITS
ecologic	Humicola	ITS
ecologic	Myceliophthora	ITS
ecologic	Trichocladium	ITS
ecologic	Cercophora	ITS
ecologic	Cladorrhinum	ITS
ecologic	Podospora	ITS
ecologic	Schizothecium	ITS
ecologic	Truncatella	ITS
ecologic	Microdochium	ITS
ecologic	Gymnopilus	ITS
ecologic	Bovista	ITS
ecologic	Lycoperdon	ITS
ecologic	Armillaria	ITS
ecologic	Coprinellus	ITS
ecologic	Lacrymaria	ITS
ecologic	Psathyrella	ITS
ecologic	Hypholoma	ITS
ecologic	Clitocybe	ITS
ecologic	Lepista	ITS
ecologic	Paralepista	ITS
ecologic	Tylospora	ITS
ecologic	Rhizopogon	ITS
ecologic	Suillus	ITS
ecologic	Phallus	ITS
ecologic	Ganoderma	ITS
ecologic	Serendipita	ITS
ecologic	Thelephora	ITS
ecologic	Trechispora	ITS
ecologic	Geminibasidium	ITS
ecologic	Rhodotorula	ITS
ecologic	Cystofilobasidium	ITS
ecologic	Tausonia	ITS
ecologic	Filobasidium	ITS
ecologic	Naganishia	ITS
ecologic	Solicoccozyma	ITS
ecologic	Holtermanniella	ITS
ecologic	Vishniacozyma	ITS
ecologic	Papiliotrema	ITS
ecologic	Saitozyma	ITS
ecologic	Apiotrichum	ITS
ecologic	Calcarisporiella	ITS
ecologic	Paraglomus	ITS
ecologic	Mortierella	ITS
ecologic	Absidia	ITS
ecologic	Cunninghamella	ITS
ecologic	Gongronella	ITS
ecologic	Mucor	ITS
ecologic	Rhizopus	ITS
ecologic	Umbelopsis	ITS
ecologic	Eustigmatos	ITS
conventional	Leptodiscella	ITS
conventional	Cladosporium	ITS
conventional	Devriesia	ITS
conventional	Aureobasidium	ITS
conventional	Hormonema	ITS
conventional	Coniothyrium	ITS
conventional	Pyrenochaeta	ITS
conventional	Pyrenochaetopsis	ITS
conventional	Boeremia	ITS
conventional	Chaetasbolisia	ITS
conventional	Didymella	ITS
conventional	Paraphaeosphaeria	ITS
conventional	Leptosphaeria	ITS
conventional	Lophiostoma	ITS
conventional	Lophiotrema	ITS
conventional	Massarina	ITS
conventional	Periconia	ITS
conventional	Ophiosphaerella	ITS
conventional	Paraphoma	ITS
conventional	Alternaria	ITS
conventional	Drechslera	ITS
conventional	Neopyrenochaeta	ITS
conventional	Dendryphion	ITS
conventional	Torula	ITS
conventional	Ochroconis	ITS
conventional	Pseudosigmoidea	ITS
conventional	Capronia	ITS
conventional	Cladophialophora	ITS
conventional	Exophiala	ITS
conventional	Knufia	ITS
conventional	Aspergillus	ITS
conventional	Penicillium	ITS
conventional	Sagenomella	ITS
conventional	Talaromyces	ITS
conventional	Chrysosporium	ITS
conventional	Spiromastix	ITS
conventional	Mollisia	ITS
conventional	Trichosporiella	ITS
conventional	Bloxamia	ITS
conventional	Hymenoscyphus	ITS
conventional	Scytalidium	ITS
conventional	Tetracladium	ITS
conventional	Cadophora	ITS
conventional	Chalara	ITS
conventional	Xylogone	ITS
conventional	Oidiodendron	ITS
conventional	Botrytis	ITS
conventional	Pseudeurotium	ITS
conventional	Pseudogymnoascus	ITS
conventional	Lipomyces	ITS
conventional	Coniochaeta	ITS
conventional	Acrostalagmus	ITS
conventional	Gibellulopsis	ITS
conventional	Plectosphaerella	ITS
conventional	Clonostachys	ITS
conventional	Gliomastix	ITS
conventional	Metarhizium	ITS
conventional	Pochonia	ITS
conventional	Monocillium	ITS
conventional	Trichoderma	ITS
conventional	Acremonium	ITS
conventional	Emericellopsis	ITS
conventional	Sarocladium	ITS
conventional	Dactylonectria	ITS
conventional	Fusarium	ITS
conventional	Fusicolla	ITS
conventional	Thelonectria	ITS
conventional	Purpureocillium	ITS
conventional	Albifimbria	ITS
conventional	Myrmecridium	ITS
conventional	Chaetomium	ITS
conventional	Humicola	ITS
conventional	Myceliophthora	ITS
conventional	Thermothielavioides	ITS
conventional	Cercophora	ITS
conventional	Podospora	ITS
conventional	Schizothecium	ITS
conventional	Truncatella	ITS
conventional	Lycoperdon	ITS
conventional	Armillaria	ITS
conventional	Coprinellus	ITS
conventional	Psathyrella	ITS
conventional	Paralepista	ITS
conventional	Suillus	ITS
conventional	Phallus	ITS
conventional	Ganoderma	ITS
conventional	Trechispora	ITS
conventional	Sakaguchia	ITS
conventional	Geminibasidium	ITS
conventional	Rhodotorula	ITS
conventional	Cystofilobasidium	ITS
conventional	Tausonia	ITS
conventional	Filobasidium	ITS
conventional	Naganishia	ITS
conventional	Solicoccozyma	ITS
conventional	Holtermanniella	ITS
conventional	Vishniacozyma	ITS
conventional	Papiliotrema	ITS
conventional	Saitozyma	ITS
conventional	Apiotrichum	ITS
conventional	Calcarisporiella	ITS
conventional	Mortierella	ITS
conventional	Cunninghamella	ITS
conventional	Gongronella	ITS
conventional	Mucor	ITS
conventional	Rhizopus	ITS
conventional	Umbelopsis	ITS
transition	Cladosporium	ITS
transition	Devriesia	ITS
transition	Aureobasidium	ITS
transition	Hormonema	ITS
transition	Coniothyrium	ITS
transition	Pyrenochaeta	ITS
transition	Pyrenochaetopsis	ITS
transition	Boeremia	ITS
transition	Chaetasbolisia	ITS
transition	Didymella	ITS
transition	Paraphaeosphaeria	ITS
transition	Pseudopithomyces	ITS
transition	Leptosphaeria	ITS
transition	Lophiostoma	ITS
transition	Lophiotrema	ITS
transition	Massarina	ITS
transition	Periconia	ITS
transition	Neosetophoma	ITS
transition	Ophiosphaerella	ITS
transition	Paraphoma	ITS
transition	Setophoma	ITS
transition	Alternaria	ITS
transition	Drechslera	ITS
transition	Neopyrenochaeta	ITS
transition	Preussia	ITS
transition	Dendryphion	ITS
transition	Torula	ITS
transition	Ochroconis	ITS
transition	Capronia	ITS
transition	Cladophialophora	ITS
transition	Exophiala	ITS
transition	Knufia	ITS
transition	Aspergillus	ITS
transition	Penicillium	ITS
transition	Sagenomella	ITS
transition	Talaromyces	ITS
transition	Chrysosporium	ITS
transition	Mollisia	ITS
transition	Bloxamia	ITS
transition	Hymenoscyphus	ITS
transition	Scytalidium	ITS
transition	Tetracladium	ITS
transition	Hyaloscypha	ITS
transition	Cadophora	ITS
transition	Chalara	ITS
transition	Mycoarthris	ITS
transition	Xylogone	ITS
transition	Alatospora	ITS
transition	Oidiodendron	ITS
transition	Botrytis	ITS
transition	Pseudeurotium	ITS
transition	Pseudogymnoascus	ITS
transition	Nadsonia	ITS
transition	Lipomyces	ITS
transition	Chloridium	ITS
transition	Coniochaeta	ITS
transition	Acrostalagmus	ITS
transition	Gibellulopsis	ITS
transition	Plectosphaerella	ITS
transition	Stachylidium	ITS
transition	Clonostachys	ITS
transition	Gliomastix	ITS
transition	Keithomyces	ITS
transition	Metarhizium	ITS
transition	Pochonia	ITS
transition	Beauveria	ITS
transition	Lecanicillium	ITS
transition	Monocillium	ITS
transition	Trichoderma	ITS
transition	Acremonium	ITS
transition	Fusariella	ITS
transition	Sarocladium	ITS
transition	Dactylonectria	ITS
transition	Fusarium	ITS
transition	Fusicolla	ITS
transition	Thelonectria	ITS
transition	Volutella	ITS
transition	Hirsutella	ITS
transition	Purpureocillium	ITS
transition	Albifimbria	ITS
transition	Arxiella	ITS
transition	Cephalotrichum	ITS
transition	Myrmecridium	ITS
transition	Arcopilus	ITS
transition	Chaetomium	ITS
transition	Humicola	ITS
transition	Thermothielavioides	ITS
transition	Cercophora	ITS
transition	Podospora	ITS
transition	Schizothecium	ITS
transition	Truncatella	ITS
transition	Inocybe	ITS
transition	Lycoperdon	ITS
transition	Coprinellus	ITS
transition	Psathyrella	ITS
transition	Paralepista	ITS
transition	Phallus	ITS
transition	Ganoderma	ITS
transition	Serendipita	ITS
transition	Trechispora	ITS
transition	Sakaguchia	ITS
transition	Geminibasidium	ITS
transition	Rhodotorula	ITS
transition	Cystofilobasidium	ITS
transition	Filobasidium	ITS
transition	Naganishia	ITS
transition	Solicoccozyma	ITS
transition	Holtermanniella	ITS
transition	Vishniacozyma	ITS
transition	Papiliotrema	ITS
transition	Saitozyma	ITS
transition	Calcarisporiella	ITS
transition	Mortierella	ITS
transition	Bifiguratus	ITS
transition	Absidia	ITS
transition	Cunninghamella	ITS
transition	Gongronella	ITS
transition	Mucor	ITS
transition	Rhizopus	ITS
transition	Umbelopsis	ITS

## Sheet: Table S8
Data
taxa	marker	category	log2FoldChange	padj	sig	high DA
Capnodium	Fungi	management_ecologic_vs_conventional	2.59441	0.000585497	DA	DA
Cladosporium	Fungi	management_ecologic_vs_conventional	1.17194	0.0279337	DA	not sig
Ramularia	Fungi	management_ecologic_vs_conventional	1.55598	0.0317757	DA	not sig
Aureobasidium	Fungi	management_ecologic_vs_conventional	-2.52469	4.92128e-06	DA	DA
Pyrenochaeta	Fungi	management_ecologic_vs_conventional	1.94972	0.00302776	DA	not sig
Pyrenochaetopsis	Fungi	management_ecologic_vs_conventional	2.28431	1.14643e-05	DA	DA
Didymella	Fungi	management_ecologic_vs_conventional	-1.51447	0.00380758	DA	not sig
Epicoccum	Fungi	management_ecologic_vs_conventional	3.01698	4.92128e-06	DA	DA
Phoma	Fungi	management_ecologic_vs_conventional	-1.91441	0.00636214	DA	not sig
Pseudopithomyces	Fungi	management_ecologic_vs_conventional	2.94188	1.0304e-05	DA	DA
Keissleriella	Fungi	management_ecologic_vs_conventional	-1.28529	0.0351891	DA	not sig
Leptosphaeria	Fungi	management_ecologic_vs_conventional	-1.24573	0.0177739	DA	not sig
Trematophoma	Fungi	management_ecologic_vs_conventional	1.42879	0.0165238	DA	not sig
Chaetosphaeronema	Fungi	management_ecologic_vs_conventional	1.38318	0.0384028	DA	not sig
Didymocyrtis	Fungi	management_ecologic_vs_conventional	2.20588	8.57006e-06	DA	DA
Paraphoma	Fungi	management_ecologic_vs_conventional	1.19916	0.037625	DA	not sig
Parastagonospora	Fungi	management_ecologic_vs_conventional	1.76445	0.00171203	DA	not sig
Drechslera	Fungi	management_ecologic_vs_conventional	-1.61138	0.0268549	DA	not sig
Pyrenophora	Fungi	management_ecologic_vs_conventional	1.71097	0.00231296	DA	not sig
Sporidesmiella	Fungi	management_ecologic_vs_conventional	1.09848	0.0360795	DA	not sig
Xenopyrenochaetopsis	Fungi	management_ecologic_vs_conventional	1.24532	0.0139046	DA	not sig
Preussia	Fungi	management_ecologic_vs_conventional	1.46474	0.0218238	DA	not sig
Cyphellophora	Fungi	management_ecologic_vs_conventional	2.35643	0.000468576	DA	DA
Exophiala	Fungi	management_ecologic_vs_conventional	1.20692	0.0123491	DA	not sig
Phialophora	Fungi	management_ecologic_vs_conventional	3.53685	2.89359e-08	DA	DA
Thermomyces	Fungi	management_ecologic_vs_conventional	-1.28346	0.041345	DA	not sig
Gymnoascus	Fungi	management_ecologic_vs_conventional	1.40075	0.0281315	DA	not sig
Spiromastix	Fungi	management_ecologic_vs_conventional	-3.04082	1.0304e-05	DA	DA
Trichosporiella	Fungi	management_ecologic_vs_conventional	-3.28874	6.12117e-08	DA	DA
Bloxamia	Fungi	management_ecologic_vs_conventional	-2.40725	0.000279806	DA	DA
Crocicreas	Fungi	management_ecologic_vs_conventional	1.72545	0.00513062	DA	not sig
Hyalodendriella	Fungi	management_ecologic_vs_conventional	-1.26558	0.0311388	DA	not sig
Xylogone	Fungi	management_ecologic_vs_conventional	-1.55046	0.00368878	DA	not sig
Clarireedia	Fungi	management_ecologic_vs_conventional	-1.85498	0.0177739	DA	not sig
Arthrobotrys	Fungi	management_ecologic_vs_conventional	1.38161	0.010956	DA	not sig
Cephaliophora	Fungi	management_ecologic_vs_conventional	2.20823	0.00107663	DA	DA
Geopyxis	Fungi	management_ecologic_vs_conventional	2.58708	0.000185878	DA	DA
Lipomyces	Fungi	management_ecologic_vs_conventional	-1.44614	0.032066	DA	not sig
Hanseniaspora	Fungi	management_ecologic_vs_conventional	-1.47838	0.0130414	DA	not sig
Chloridium	Fungi	management_ecologic_vs_conventional	1.43138	0.0023277	DA	not sig
Coniochaeta	Fungi	management_ecologic_vs_conventional	-1.91203	0.000297508	DA	not sig
Coniella	Fungi	management_ecologic_vs_conventional	-1.32546	0.0177739	DA	not sig
Cephalosporium	Fungi	management_ecologic_vs_conventional	1.77119	0.00204408	DA	not sig
Gibellulopsis	Fungi	management_ecologic_vs_conventional	1.62441	0.00623985	DA	not sig
Collarina	Fungi	management_ecologic_vs_conventional	2.40465	6.68119e-06	DA	DA
Keithomyces	Fungi	management_ecologic_vs_conventional	2.32282	1.06182e-05	DA	DA
Pochonia	Fungi	management_ecologic_vs_conventional	1.59311	0.00402618	DA	not sig
Beauveria	Fungi	management_ecologic_vs_conventional	1.44172	0.0396266	DA	not sig
Fusarium	Fungi	management_ecologic_vs_conventional	-0.754807	0.0177739	DA	not sig
Fusicolla	Fungi	management_ecologic_vs_conventional	1.37206	0.00451456	DA	not sig
Lophotrichus	Fungi	management_ecologic_vs_conventional	1.2911	0.0479126	DA	not sig
Scopulariopsis	Fungi	management_ecologic_vs_conventional	1.92249	0.000297508	DA	not sig
Acrophialophora	Fungi	management_ecologic_vs_conventional	-1.63684	0.0218238	DA	not sig
Arcopilus	Fungi	management_ecologic_vs_conventional	-1.72371	0.0293322	DA	not sig
Chaetomium	Fungi	management_ecologic_vs_conventional	-1.19479	0.00447456	DA	not sig
Schizothecium	Fungi	management_ecologic_vs_conventional	1.54615	0.0235541	DA	not sig
Truncatella	Fungi	management_ecologic_vs_conventional	-1.82256	0.000468576	DA	not sig
Lepiota	Fungi	management_ecologic_vs_conventional	1.66328	0.0177739	DA	not sig
Leucoagaricus	Fungi	management_ecologic_vs_conventional	4.24791	1.04571e-07	DA	DA
Tulostoma	Fungi	management_ecologic_vs_conventional	2.67276	1.0304e-05	DA	DA
Bolbitius	Fungi	management_ecologic_vs_conventional	1.49453	0.00643797	DA	not sig
Conocybe	Fungi	management_ecologic_vs_conventional	1.61713	0.0150109	DA	not sig
Campanella	Fungi	management_ecologic_vs_conventional	1.76629	0.00658551	DA	not sig
Gymnopus	Fungi	management_ecologic_vs_conventional	-1.77717	0.0279337	DA	not sig
Coprinopsis	Fungi	management_ecologic_vs_conventional	2.03042	0.00293444	DA	DA
Lacrymaria	Fungi	management_ecologic_vs_conventional	3.27705	1.46608e-07	DA	DA
Sclerotium	Fungi	management_ecologic_vs_conventional	-2.72655	0.00157564	DA	DA
Piloderma	Fungi	management_ecologic_vs_conventional	-1.51761	0.0315168	DA	not sig
Clavulina	Fungi	management_ecologic_vs_conventional	-1.66543	0.0124878	DA	not sig
Burgoa	Fungi	management_ecologic_vs_conventional	-1.18144	0.0494793	DA	not sig
Serendipita	Fungi	management_ecologic_vs_conventional	1.67264	0.0215416	DA	not sig
Pseudotomentella	Fungi	management_ecologic_vs_conventional	-1.62179	0.0177739	DA	not sig
Sakaguchia	Fungi	management_ecologic_vs_conventional	-2.68645	1.98247e-05	DA	DA
Rhodotorula	Fungi	management_ecologic_vs_conventional	-3.15797	2.86634e-07	DA	DA
Solicoccozyma	Fungi	management_ecologic_vs_conventional	-0.726086	0.0141013	DA	not sig
Cryptococcus	Fungi	management_ecologic_vs_conventional	-1.15488	0.0378238	DA	not sig
Saitozyma	Fungi	management_ecologic_vs_conventional	-1.13401	0.00636214	DA	not sig
Tetragoniomyces	Fungi	management_ecologic_vs_conventional	1.62051	0.0018434	DA	not sig
Wallemia	Fungi	management_ecologic_vs_conventional	1.17617	0.0281315	DA	not sig
Diversispora	Fungi	management_ecologic_vs_conventional	1.78897	0.0108316	DA	not sig
Cunninghamella	Fungi	management_ecologic_vs_conventional	-2.12103	0.000590944	DA	DA
Umbelopsis	Fungi	management_ecologic_vs_conventional	-1.44118	0.0177739	DA	not sig
Capnodium sp.	Fungi	management_ecologic_vs_conventional	2.59441	0.000585497	DA	DA
Cladosporium sp.	Fungi	management_ecologic_vs_conventional	2.89768	3.89671e-06	DA	DA
Ramularia hydrangeae-macrophyllae	Fungi	management_ecologic_vs_conventional	1.16763	0.0356942	DA	not sig
Aureobasidium pullulans	Fungi	management_ecologic_vs_conventional	-2.52469	4.92128e-06	DA	DA
Coniothyrium sp.	Fungi	management_ecologic_vs_conventional	1.87236	0.000825652	DA	not sig
Pyrenochaeta inflorescentiae	Fungi	management_ecologic_vs_conventional	1.29189	0.0254531	DA	not sig
Pyrenochaeta sp.	Fungi	management_ecologic_vs_conventional	1.95693	0.00293444	DA	not sig
Pyrenochaetopsis leptospora	Fungi	management_ecologic_vs_conventional	2.62956	3.53322e-06	DA	DA
Chaetasbolisia erysiphoides	Fungi	management_ecologic_vs_conventional	1.67765	0.0150109	DA	not sig
Didymella exigua	Fungi	management_ecologic_vs_conventional	-1.5259	0.0036233	DA	not sig
Epicoccum nigrum	Fungi	management_ecologic_vs_conventional	1.72826	0.0082547	DA	not sig
Paraphaeosphaeria sp.	Fungi	management_ecologic_vs_conventional	1.32642	0.0196227	DA	not sig
Paraphaeosphaeria sporulosa	Fungi	management_ecologic_vs_conventional	-1.45293	0.0371695	DA	not sig
Pseudopithomyces chartarum	Fungi	management_ecologic_vs_conventional	3.26212	1.70422e-06	DA	DA
Leptosphaeria biglobosa	Fungi	management_ecologic_vs_conventional	-1.27082	0.0213177	DA	not sig
Lophiotrema sp.	Fungi	management_ecologic_vs_conventional	-2.53921	0.000185878	DA	DA
Trematophoma sp.	Fungi	management_ecologic_vs_conventional	1.42879	0.0165238	DA	not sig
Chaetosphaeronema sp.	Fungi	management_ecologic_vs_conventional	1.38318	0.0384028	DA	not sig
Didymocyrtis cladoniicola	Fungi	management_ecologic_vs_conventional	2.20588	8.57006e-06	DA	DA
Ophiosphaerella narmari	Fungi	management_ecologic_vs_conventional	2.03516	0.000932855	DA	DA
Paraphoma rhaphiolepidis	Fungi	management_ecologic_vs_conventional	1.63743	0.00660144	DA	not sig
Parastagonospora phoenicicola	Fungi	management_ecologic_vs_conventional	1.76445	0.00171203	DA	not sig
Alternaria sp.	Fungi	management_ecologic_vs_conventional	-1.70637	0.0116132	DA	not sig
Curvularia portulacae	Fungi	management_ecologic_vs_conventional	-2.65719	0.000120797	DA	DA
Drechslera sp.	Fungi	management_ecologic_vs_conventional	-1.61138	0.0268549	DA	not sig
Pyrenophora biseptata	Fungi	management_ecologic_vs_conventional	1.18571	0.0166508	DA	not sig
Sporidesmiella sp.	Fungi	management_ecologic_vs_conventional	1.09848	0.0360795	DA	not sig
Xenopyrenochaetopsis pratorum	Fungi	management_ecologic_vs_conventional	1.24532	0.0139046	DA	not sig
Preussia sp.	Fungi	management_ecologic_vs_conventional	2.65568	3.12611e-05	DA	DA
Torula hollandica	Fungi	management_ecologic_vs_conventional	1.41156	0.0267814	DA	not sig
Torula sp.	Fungi	management_ecologic_vs_conventional	1.99743	0.000279806	DA	not sig
Cyphellophora vermispora	Fungi	management_ecologic_vs_conventional	2.62711	2.64785e-06	DA	DA
Cladophialophora chaetospira	Fungi	management_ecologic_vs_conventional	1.40125	0.0456294	DA	not sig
Exophiala equina	Fungi	management_ecologic_vs_conventional	2.7778	2.96473e-07	DA	DA
Exophiala opportunistica	Fungi	management_ecologic_vs_conventional	1.28939	0.0457508	DA	not sig
Exophiala sp.	Fungi	management_ecologic_vs_conventional	2.20642	0.000906317	DA	DA
Exophiala xenobiotica	Fungi	management_ecologic_vs_conventional	-3.59617	7.43469e-06	DA	DA
Phialophora mustea	Fungi	management_ecologic_vs_conventional	3.10848	1.0041e-06	DA	DA
Phialophora sp.	Fungi	management_ecologic_vs_conventional	3.1951	6.12117e-08	DA	DA
Aspergillus chlamydosporus	Fungi	management_ecologic_vs_conventional	-1.36369	0.0324835	DA	not sig
Aspergillus europaeus	Fungi	management_ecologic_vs_conventional	-1.07589	0.0396266	DA	not sig
Aspergillus felis	Fungi	management_ecologic_vs_conventional	-2.15843	0.00627537	DA	DA
Aspergillus flavipes	Fungi	management_ecologic_vs_conventional	3.746	1.07116e-13	DA	DA
Aspergillus fumigatiaffinis	Fungi	management_ecologic_vs_conventional	-1.43426	0.0254531	DA	not sig
Aspergillus japonicus	Fungi	management_ecologic_vs_conventional	-1.46286	0.0338082	DA	not sig
Penicillium adametzii	Fungi	management_ecologic_vs_conventional	-3.42563	5.05688e-06	DA	DA
Penicillium alexiae	Fungi	management_ecologic_vs_conventional	1.98009	0.000426527	DA	not sig
Penicillium bialowiezense	Fungi	management_ecologic_vs_conventional	1.30511	0.0317757	DA	not sig
Penicillium brasilianum	Fungi	management_ecologic_vs_conventional	1.84141	0.00152997	DA	not sig
Penicillium christenseniae	Fungi	management_ecologic_vs_conventional	2.34336	0.000147766	DA	DA
Penicillium herquei	Fungi	management_ecologic_vs_conventional	1.65234	0.0177739	DA	not sig
Penicillium nepalense	Fungi	management_ecologic_vs_conventional	-2.04857	0.000825652	DA	DA
Penicillium ovatum	Fungi	management_ecologic_vs_conventional	-1.42889	0.0261375	DA	not sig
Penicillium roseopurpureum	Fungi	management_ecologic_vs_conventional	4.49047	1.36168e-09	DA	DA
Penicillium virgatum	Fungi	management_ecologic_vs_conventional	2.08735	0.00171203	DA	DA
Talaromyces australis	Fungi	management_ecologic_vs_conventional	3.08046	2.64785e-06	DA	DA
Talaromyces coalescens	Fungi	management_ecologic_vs_conventional	1.16065	0.0279077	DA	not sig
Talaromyces rogersiae	Fungi	management_ecologic_vs_conventional	1.34931	0.0146556	DA	not sig
Talaromyces verruculosus	Fungi	management_ecologic_vs_conventional	1.28892	0.01581	DA	not sig
Thermomyces stellatus	Fungi	management_ecologic_vs_conventional	-1.41773	0.0303509	DA	not sig
Emmonsiellopsis terrestris	Fungi	management_ecologic_vs_conventional	1.39841	0.0153485	DA	not sig
Chrysosporium queenslandicum	Fungi	management_ecologic_vs_conventional	2.4486	9.81142e-05	DA	DA
Spiromastix sp.	Fungi	management_ecologic_vs_conventional	-3.04082	1.0304e-05	DA	DA
Trichosporiella multisporum	Fungi	management_ecologic_vs_conventional	-3.32541	2.96473e-07	DA	DA
Bloxamia sp.	Fungi	management_ecologic_vs_conventional	-2.40725	0.000279806	DA	DA
Crocicreas sp.	Fungi	management_ecologic_vs_conventional	1.72545	0.00513062	DA	not sig
Cadophora orchidicola	Fungi	management_ecologic_vs_conventional	1.35466	0.0117266	DA	not sig
Chalara sp.	Fungi	management_ecologic_vs_conventional	1.94096	0.00675813	DA	not sig
Hyalodendriella betulae	Fungi	management_ecologic_vs_conventional	-1.26558	0.0311388	DA	not sig
Xylogone sphaerospora	Fungi	management_ecologic_vs_conventional	-1.55046	0.00368878	DA	not sig
Clarireedia bennettii	Fungi	management_ecologic_vs_conventional	-1.85498	0.0177739	DA	not sig
Arthrobotrys oligospora	Fungi	management_ecologic_vs_conventional	1.43488	0.00684016	DA	not sig
Cephaliophora sp.	Fungi	management_ecologic_vs_conventional	2.20823	0.00107663	DA	DA
Geopyxis sp.	Fungi	management_ecologic_vs_conventional	2.58708	0.000185878	DA	DA
Lipomyces sp.	Fungi	management_ecologic_vs_conventional	-1.56484	0.030693	DA	not sig
Lipomyces starkeyi	Fungi	management_ecologic_vs_conventional	-1.45984	0.0344263	DA	not sig
Hanseniaspora uvarum	Fungi	management_ecologic_vs_conventional	-1.53309	0.0107521	DA	not sig
Chloridium sp.	Fungi	management_ecologic_vs_conventional	1.51957	0.00529882	DA	not sig
Coniochaeta fasciculata	Fungi	management_ecologic_vs_conventional	-1.24071	0.0159378	DA	not sig
Coniochaeta lignicola	Fungi	management_ecologic_vs_conventional	1.20451	0.0317757	DA	not sig
Coniochaeta sp.	Fungi	management_ecologic_vs_conventional	-1.39558	0.0479126	DA	not sig
Coniella diplodiella	Fungi	management_ecologic_vs_conventional	-1.32546	0.0177739	DA	not sig
Cephalosporium gramineum	Fungi	management_ecologic_vs_conventional	1.77119	0.00204408	DA	not sig
Gibellulopsis sp.	Fungi	management_ecologic_vs_conventional	2.97411	1.30963e-05	DA	DA
Plectosphaerella oratosquillae	Fungi	management_ecologic_vs_conventional	1.43309	0.0313639	DA	not sig
Clonostachys miodochialis	Fungi	management_ecologic_vs_conventional	-1.75183	0.00148141	DA	not sig
Collarina aurantiaca	Fungi	management_ecologic_vs_conventional	2.40465	6.68119e-06	DA	DA
Keithomyces carneus	Fungi	management_ecologic_vs_conventional	2.32282	1.06182e-05	DA	DA
Metarhizium marquandii	Fungi	management_ecologic_vs_conventional	2.01446	0.000257863	DA	DA
Metarhizium sp.	Fungi	management_ecologic_vs_conventional	1.83119	0.00171203	DA	not sig
Pochonia chlamydosporia	Fungi	management_ecologic_vs_conventional	1.59311	0.00402618	DA	not sig
Beauveria bassiana	Fungi	management_ecologic_vs_conventional	1.94124	0.00624529	DA	not sig
Monocillium mucidum	Fungi	management_ecologic_vs_conventional	-1.77721	0.00128	DA	not sig
Dactylonectria macrodidyma	Fungi	management_ecologic_vs_conventional	-2.18809	0.000970433	DA	DA
Fusarium biseptatum	Fungi	management_ecologic_vs_conventional	-1.48659	0.0224664	DA	not sig
Fusarium brachygibbosum	Fungi	management_ecologic_vs_conventional	-1.5399	0.037625	DA	not sig
Fusarium oxysporum	Fungi	management_ecologic_vs_conventional	-0.8039	0.0311388	DA	not sig
Fusicolla septimanifiniscientiae	Fungi	management_ecologic_vs_conventional	1.45535	0.0059196	DA	not sig
Ilyonectria mors-panacis	Fungi	management_ecologic_vs_conventional	-1.77725	0.00636214	DA	not sig
Purpureocillium lavendulum	Fungi	management_ecologic_vs_conventional	2.4524	0.000150901	DA	DA
Cephalotrichum sp.	Fungi	management_ecologic_vs_conventional	1.87926	0.00346007	DA	not sig
Scopulariopsis brevicaulis	Fungi	management_ecologic_vs_conventional	1.829	0.000468576	DA	not sig
Acrophialophora sp.	Fungi	management_ecologic_vs_conventional	-1.63684	0.0218238	DA	not sig
Arcopilus sp.	Fungi	management_ecologic_vs_conventional	-2.86071	0.000150901	DA	DA
Chaetomium homopilatum	Fungi	management_ecologic_vs_conventional	1.48915	0.0018434	DA	not sig
Chaetomium madrasense	Fungi	management_ecologic_vs_conventional	-2.17823	0.00293444	DA	DA
Chaetomium sp.	Fungi	management_ecologic_vs_conventional	-1.46817	0.0125943	DA	not sig
Dichotomopilus funicola	Fungi	management_ecologic_vs_conventional	1.15151	0.0166508	DA	not sig
Cladorrhinum foecundissimum	Fungi	management_ecologic_vs_conventional	1.17402	0.0233399	DA	not sig
Schizothecium curvuloides	Fungi	management_ecologic_vs_conventional	1.29613	0.0146556	DA	not sig
Truncatella angustata	Fungi	management_ecologic_vs_conventional	-1.82256	0.000468576	DA	not sig
Agaricus comtulus	Fungi	management_ecologic_vs_conventional	1.28587	0.0189108	DA	not sig
Lepiota subincarnata	Fungi	management_ecologic_vs_conventional	2.33618	0.000374888	DA	DA
Leucoagaricus tener	Fungi	management_ecologic_vs_conventional	4.45997	5.50394e-10	DA	DA
Tulostoma sp.	Fungi	management_ecologic_vs_conventional	2.67276	1.0304e-05	DA	DA
Bolbitius subvolvatus	Fungi	management_ecologic_vs_conventional	1.49453	0.00643797	DA	not sig
Conocybe apala	Fungi	management_ecologic_vs_conventional	1.84928	0.000725631	DA	not sig
Conocybe velutipes	Fungi	management_ecologic_vs_conventional	1.59885	0.0128552	DA	not sig
Clavaria sp.	Fungi	management_ecologic_vs_conventional	1.10197	0.0381452	DA	not sig
Campanella caesia	Fungi	management_ecologic_vs_conventional	1.76629	0.00658551	DA	not sig
Gymnopus luxurians	Fungi	management_ecologic_vs_conventional	-2.40887	0.0018434	DA	DA
Coprinopsis radiata	Fungi	management_ecologic_vs_conventional	1.18605	0.0267814	DA	not sig
Coprinopsis urticicola	Fungi	management_ecologic_vs_conventional	1.61078	0.00461862	DA	not sig
Lacrymaria lacrymabunda	Fungi	management_ecologic_vs_conventional	3.27705	1.46608e-07	DA	DA
Sclerotium sp.	Fungi	management_ecologic_vs_conventional	-2.72655	0.00157564	DA	DA
Piloderma sp.	Fungi	management_ecologic_vs_conventional	-1.51761	0.0315168	DA	not sig
Clavulina sp.	Fungi	management_ecologic_vs_conventional	-1.66543	0.0124878	DA	not sig
Burgoa anomala	Fungi	management_ecologic_vs_conventional	-1.18144	0.0494793	DA	not sig
Serendipita sp.	Fungi	management_ecologic_vs_conventional	1.67264	0.0215416	DA	not sig
Pseudotomentella umbrina	Fungi	management_ecologic_vs_conventional	-1.62179	0.0177739	DA	not sig
Tomentella sp.	Fungi	management_ecologic_vs_conventional	-1.58063	0.030693	DA	not sig
Sakaguchia sp.	Fungi	management_ecologic_vs_conventional	-2.68645	1.98247e-05	DA	DA
Rhodotorula graminis	Fungi	management_ecologic_vs_conventional	-3.0143	2.64785e-06	DA	DA
Rhodotorula sp.	Fungi	management_ecologic_vs_conventional	-2.46896	0.000160586	DA	DA
Naganishia friedmannii	Fungi	management_ecologic_vs_conventional	-2.71035	0.000257863	DA	DA
Solicoccozyma terrea	Fungi	management_ecologic_vs_conventional	-1.0951	0.00293444	DA	not sig
Papiliotrema terrestris	Fungi	management_ecologic_vs_conventional	-1.98809	0.000936642	DA	not sig
Cryptococcus sp.	Fungi	management_ecologic_vs_conventional	-1.15488	0.0378238	DA	not sig
Saitozyma flava	Fungi	management_ecologic_vs_conventional	1.14139	0.0313639	DA	not sig
Saitozyma podzolica	Fungi	management_ecologic_vs_conventional	-1.14064	0.00624529	DA	not sig
Tetragoniomyces uliginosus	Fungi	management_ecologic_vs_conventional	1.62051	0.0018434	DA	not sig
Wallemia canadensis	Fungi	management_ecologic_vs_conventional	1.17617	0.0281315	DA	not sig
Mortierella amoeboidea	Fungi	management_ecologic_vs_conventional	2.1713	0.0101551	DA	DA
Mortierella fatshederae	Fungi	management_ecologic_vs_conventional	-1.62465	0.029291	DA	not sig
Mortierella fimbricystis	Fungi	management_ecologic_vs_conventional	1.56964	0.00688427	DA	not sig
Mortierella globulifera	Fungi	management_ecologic_vs_conventional	2.12137	0.000314568	DA	DA
Mortierella hyalina	Fungi	management_ecologic_vs_conventional	-1.87616	0.00921029	DA	not sig
Mortierella sarnyensis	Fungi	management_ecologic_vs_conventional	-1.80654	0.0394792	DA	not sig
Cunninghamella sp.	Fungi	management_ecologic_vs_conventional	-3.02228	6.68119e-06	DA	DA
Mucor hiemalis	Fungi	management_ecologic_vs_conventional	1.45124	0.0440051	DA	not sig
Umbelopsis nana	Fungi	management_ecologic_vs_conventional	2.17106	0.000138689	DA	DA
Antennariella	Fungi	management_transition_vs_conventional	-1.90225	0.0376787	DA	not sig
Cladosporium	Fungi	management_transition_vs_conventional	1.15434	0.0491165	DA	not sig
Ramularia	Fungi	management_transition_vs_conventional	2.70526	6.25698e-05	DA	DA
Cenococcum	Fungi	management_transition_vs_conventional	-1.54661	0.0442747	DA	not sig
Didymella	Fungi	management_transition_vs_conventional	-2.87269	7.46078e-09	DA	DA
Phoma	Fungi	management_transition_vs_conventional	-2.14659	0.00466756	DA	DA
Paraleptosphaeria	Fungi	management_transition_vs_conventional	2.91235	7.32149e-05	DA	DA
Lophiostoma	Fungi	management_transition_vs_conventional	-1.46073	0.0440939	DA	not sig
Paraphoma	Fungi	management_transition_vs_conventional	1.67705	0.00453153	DA	not sig
Phaeosphaeriopsis	Fungi	management_transition_vs_conventional	-1.51857	0.0442747	DA	not sig
Setophaeosphaeria	Fungi	management_transition_vs_conventional	-1.60717	0.0242287	DA	not sig
Curvularia	Fungi	management_transition_vs_conventional	-2.67898	0.00466756	DA	DA
Pseudopyrenochaeta	Fungi	management_transition_vs_conventional	3.57806	2.73513e-07	DA	DA
Cyphellophora	Fungi	management_transition_vs_conventional	2.40946	0.000715035	DA	DA
Cladophialophora	Fungi	management_transition_vs_conventional	1.52248	0.00816025	DA	not sig
Neosartorya	Fungi	management_transition_vs_conventional	1.43127	0.00564638	DA	not sig
Emmonsiellopsis	Fungi	management_transition_vs_conventional	1.51706	0.0379164	DA	not sig
Myriodontium	Fungi	management_transition_vs_conventional	1.14322	0.0386404	DA	not sig
Trichosporiella	Fungi	management_transition_vs_conventional	-1.74819	0.00920899	DA	not sig
Bloxamia	Fungi	management_transition_vs_conventional	-2.31181	0.00122372	DA	DA
Chalara	Fungi	management_transition_vs_conventional	1.66688	0.034225	DA	not sig
Phialocephala	Fungi	management_transition_vs_conventional	-1.67034	0.0290871	DA	not sig
Geopyxis	Fungi	management_transition_vs_conventional	1.66794	0.0459431	DA	not sig
Candida	Fungi	management_transition_vs_conventional	-1.56116	0.042537	DA	not sig
Nadsonia	Fungi	management_transition_vs_conventional	1.48639	0.031195	DA	not sig
Hanseniaspora	Fungi	management_transition_vs_conventional	-1.30037	0.0450743	DA	not sig
Codinaea	Fungi	management_transition_vs_conventional	1.89154	0.00922942	DA	not sig
Diaporthe	Fungi	management_transition_vs_conventional	2.69588	8.55299e-06	DA	DA
Acrostalagmus	Fungi	management_transition_vs_conventional	1.27151	0.0442747	DA	not sig
Keithomyces	Fungi	management_transition_vs_conventional	1.36221	0.0383982	DA	not sig
Beauveria	Fungi	management_transition_vs_conventional	2.54886	0.000120406	DA	DA
Cordyceps	Fungi	management_transition_vs_conventional	1.42939	0.00922942	DA	not sig
Sesquicillium	Fungi	management_transition_vs_conventional	2.00724	0.000439663	DA	DA
Arnium	Fungi	management_transition_vs_conventional	-1.61857	0.0346054	DA	not sig
Arthrinium	Fungi	management_transition_vs_conventional	-2.35571	0.00475224	DA	DA
Truncatella	Fungi	management_transition_vs_conventional	-1.72524	0.00235763	DA	not sig
Lepiota	Fungi	management_transition_vs_conventional	2.91462	1.02102e-05	DA	DA
Bovista	Fungi	management_transition_vs_conventional	1.97976	0.00243725	DA	not sig
Marasmius	Fungi	management_transition_vs_conventional	2.28579	0.00396797	DA	DA
Coprinopsis	Fungi	management_transition_vs_conventional	1.88824	0.0115385	DA	not sig
Melanoleuca	Fungi	management_transition_vs_conventional	1.36542	0.0385317	DA	not sig
Lactifluus	Fungi	management_transition_vs_conventional	1.26579	0.0361791	DA	not sig
Serendipita	Fungi	management_transition_vs_conventional	2.12005	0.00466756	DA	DA
Pseudotomentella	Fungi	management_transition_vs_conventional	-1.58962	0.0376787	DA	not sig
Sakaguchia	Fungi	management_transition_vs_conventional	-2.06856	0.00239082	DA	DA
Rhodotorula	Fungi	management_transition_vs_conventional	-3.24501	3.30812e-07	DA	DA
Tremella	Fungi	management_transition_vs_conventional	1.91338	0.000587859	DA	not sig
Saitozyma	Fungi	management_transition_vs_conventional	-0.993057	0.0361791	DA	not sig
Diversispora	Fungi	management_transition_vs_conventional	3.75845	1.59645e-09	DA	DA
Rhizophagus	Fungi	management_transition_vs_conventional	1.50572	0.00972795	DA	not sig
Bifiguratus	Fungi	management_transition_vs_conventional	3.42168	6.34729e-10	DA	DA
Absidia	Fungi	management_transition_vs_conventional	2.6856	3.86181e-06	DA	DA
Antennariella placitae	Fungi	management_transition_vs_conventional	-1.90225	0.0376787	DA	not sig
Cladosporium herbarum	Fungi	management_transition_vs_conventional	1.20622	0.0440939	DA	not sig
Coniothyrium sp.	Fungi	management_transition_vs_conventional	1.50432	0.0206092	DA	not sig
Didymella exigua	Fungi	management_transition_vs_conventional	-2.89377	6.60149e-09	DA	DA
Phoma herbarum	Fungi	management_transition_vs_conventional	-1.48799	0.0322104	DA	not sig
Paraleptosphaeria rumicis	Fungi	management_transition_vs_conventional	2.91235	7.32149e-05	DA	DA
Lophiostoma sp.	Fungi	management_transition_vs_conventional	-1.88005	0.00922942	DA	not sig
Lophiotrema sp.	Fungi	management_transition_vs_conventional	-2.87291	6.25698e-05	DA	DA
Paraphoma chrysanthemicola	Fungi	management_transition_vs_conventional	-1.61916	0.0269902	DA	not sig
Paraphoma pye	Fungi	management_transition_vs_conventional	1.33742	0.0442747	DA	not sig
Paraphoma rhaphiolepidis	Fungi	management_transition_vs_conventional	2.42409	5.85192e-05	DA	DA
Phaeosphaeriopsis sp.	Fungi	management_transition_vs_conventional	-1.51857	0.0442747	DA	not sig
Setophaeosphaeria badalingensis	Fungi	management_transition_vs_conventional	-1.60717	0.0242287	DA	not sig
Alternaria lolii	Fungi	management_transition_vs_conventional	1.82159	0.00218198	DA	not sig
Curvularia portulacae	Fungi	management_transition_vs_conventional	-2.65063	0.000367065	DA	DA
Curvularia spicifera	Fungi	management_transition_vs_conventional	-3.61502	0.000120406	DA	DA
Pseudopyrenochaeta lycopersici	Fungi	management_transition_vs_conventional	3.57806	2.73513e-07	DA	DA
Preussia sp.	Fungi	management_transition_vs_conventional	2.24972	0.00148224	DA	DA
Torula acaciae	Fungi	management_transition_vs_conventional	1.56677	0.00453153	DA	not sig
Ochroconis bacilliformis	Fungi	management_transition_vs_conventional	1.69884	0.0284259	DA	not sig
Cyphellophora sp.	Fungi	management_transition_vs_conventional	1.82262	0.00328175	DA	not sig
Cladophialophora chaetospira	Fungi	management_transition_vs_conventional	1.74999	0.0181204	DA	not sig
Exophiala bonariae	Fungi	management_transition_vs_conventional	1.70669	0.00564638	DA	not sig
Exophiala equina	Fungi	management_transition_vs_conventional	1.60888	0.0110259	DA	not sig
Exophiala opportunistica	Fungi	management_transition_vs_conventional	1.54328	0.0264114	DA	not sig
Aspergillus fumigatus	Fungi	management_transition_vs_conventional	2.25658	0.00605777	DA	DA
Aspergillus neoniveus	Fungi	management_transition_vs_conventional	-2.2974	0.00235763	DA	DA
Aspergillus niger	Fungi	management_transition_vs_conventional	-1.69974	0.0350041	DA	not sig
Aspergillus sp.	Fungi	management_transition_vs_conventional	-1.46481	0.0376787	DA	not sig
Aspergillus terreus	Fungi	management_transition_vs_conventional	-2.80713	0.000133525	DA	DA
Neosartorya sp.	Fungi	management_transition_vs_conventional	1.43127	0.00564638	DA	not sig
Penicillium adametzii	Fungi	management_transition_vs_conventional	-2.42202	0.00235763	DA	DA
Penicillium bialowiezense	Fungi	management_transition_vs_conventional	1.58679	0.0107289	DA	not sig
Penicillium bilaiae	Fungi	management_transition_vs_conventional	-1.80675	0.0110259	DA	not sig
Penicillium citrinum	Fungi	management_transition_vs_conventional	1.85559	0.0173469	DA	not sig
Penicillium herquei	Fungi	management_transition_vs_conventional	1.90445	0.00970118	DA	not sig
Penicillium levitum	Fungi	management_transition_vs_conventional	-2.05931	0.000973661	DA	DA
Penicillium moldavicum	Fungi	management_transition_vs_conventional	2.92471	0.000687251	DA	DA
Penicillium ovatum	Fungi	management_transition_vs_conventional	-1.42235	0.0448785	DA	not sig
Penicillium parvulum	Fungi	management_transition_vs_conventional	1.92715	0.00800009	DA	not sig
Penicillium pimiteouiense	Fungi	management_transition_vs_conventional	-3.12967	1.02102e-05	DA	DA
Penicillium roseopurpureum	Fungi	management_transition_vs_conventional	3.97026	2.73513e-07	DA	DA
Penicillium vanoranjei	Fungi	management_transition_vs_conventional	1.60612	0.00866103	DA	not sig
Penicillium virgatum	Fungi	management_transition_vs_conventional	2.22879	0.0014794	DA	DA
Talaromyces minioluteus	Fungi	management_transition_vs_conventional	1.1915	0.0383982	DA	not sig
Emmonsiellopsis coralliformis	Fungi	management_transition_vs_conventional	1.58775	0.0442747	DA	not sig
Arachnomyces kanei	Fungi	management_transition_vs_conventional	1.38591	0.0126495	DA	not sig
Chrysosporium merdarium	Fungi	management_transition_vs_conventional	3.50537	6.34729e-10	DA	DA
Myriodontium keratinophilum	Fungi	management_transition_vs_conventional	1.14322	0.0386404	DA	not sig
Trichosporiella multisporum	Fungi	management_transition_vs_conventional	-1.63647	0.0302467	DA	not sig
Bloxamia sp.	Fungi	management_transition_vs_conventional	-2.31181	0.00122372	DA	DA
Chalara sp.	Fungi	management_transition_vs_conventional	2.55543	0.000460629	DA	DA
Oidiodendron flavum	Fungi	management_transition_vs_conventional	1.18967	0.0439978	DA	not sig
Geopyxis sp.	Fungi	management_transition_vs_conventional	1.66794	0.0459431	DA	not sig
Nadsonia starkeyi-henricii	Fungi	management_transition_vs_conventional	1.48639	0.031195	DA	not sig
Lipomyces sp.	Fungi	management_transition_vs_conventional	1.47017	0.0264435	DA	not sig
Lipomyces starkeyi	Fungi	management_transition_vs_conventional	-1.55141	0.0401034	DA	not sig
Hanseniaspora uvarum	Fungi	management_transition_vs_conventional	-1.28139	0.0492698	DA	not sig
Codinaea acaciae	Fungi	management_transition_vs_conventional	1.89154	0.00922942	DA	not sig
Diaporthe columnaris	Fungi	management_transition_vs_conventional	1.35878	0.0322104	DA	not sig
Diaporthe sp.	Fungi	management_transition_vs_conventional	1.95727	0.00133097	DA	not sig
Acrostalagmus luteoalbus	Fungi	management_transition_vs_conventional	1.27151	0.0442747	DA	not sig
Clonostachys miodochialis	Fungi	management_transition_vs_conventional	-2.13142	0.000500965	DA	DA
Keithomyces carneus	Fungi	management_transition_vs_conventional	1.36221	0.0383982	DA	not sig
Metarhizium marquandii	Fungi	management_transition_vs_conventional	1.45858	0.0247903	DA	not sig
Beauveria bassiana	Fungi	management_transition_vs_conventional	3.19994	1.53041e-06	DA	DA
Cordyceps javanica	Fungi	management_transition_vs_conventional	1.42934	0.00906747	DA	not sig
Emericellopsis humicola	Fungi	management_transition_vs_conventional	-1.37995	0.0283356	DA	not sig
Emericellopsis minima	Fungi	management_transition_vs_conventional	1.50319	0.0302467	DA	not sig
Sesquicillium microsporum	Fungi	management_transition_vs_conventional	2.00724	0.000439663	DA	DA
Fusarium biseptatum	Fungi	management_transition_vs_conventional	-1.76838	0.0151621	DA	not sig
Fusarium sp.	Fungi	management_transition_vs_conventional	-1.347	0.0430988	DA	not sig
Purpureocillium lavendulum	Fungi	management_transition_vs_conventional	2.52863	0.00021224	DA	DA
Cephalotrichum microsporum	Fungi	management_transition_vs_conventional	1.8678	0.000688832	DA	not sig
Cephalotrichum sp.	Fungi	management_transition_vs_conventional	1.47947	0.0458568	DA	not sig
Lophotrichus sp.	Fungi	management_transition_vs_conventional	1.71529	0.00283345	DA	not sig
Sporothrix inflata	Fungi	management_transition_vs_conventional	1.46591	0.0110839	DA	not sig
Arnium sp.	Fungi	management_transition_vs_conventional	-1.61857	0.0346054	DA	not sig
Arthrinium arundinis	Fungi	management_transition_vs_conventional	-2.35571	0.00475224	DA	DA
Truncatella angustata	Fungi	management_transition_vs_conventional	-1.72524	0.00235763	DA	not sig
Lepiota sp.	Fungi	management_transition_vs_conventional	2.42199	0.000120406	DA	DA
Lepiota subincarnata	Fungi	management_transition_vs_conventional	2.96385	6.66281e-06	DA	DA
Bovista plumbea	Fungi	management_transition_vs_conventional	2.05333	0.000688832	DA	DA
Marasmius oreades	Fungi	management_transition_vs_conventional	3.06328	2.4414e-05	DA	DA
Coprinopsis friesii	Fungi	management_transition_vs_conventional	1.29156	0.0385317	DA	not sig
Melanoleuca sp.	Fungi	management_transition_vs_conventional	1.89198	0.00131982	DA	not sig
Lactifluus subvolemus	Fungi	management_transition_vs_conventional	1.26579	0.0361791	DA	not sig
Serendipita sp.	Fungi	management_transition_vs_conventional	2.12005	0.00466756	DA	DA
Pseudotomentella umbrina	Fungi	management_transition_vs_conventional	-1.58962	0.0376787	DA	not sig
Sakaguchia sp.	Fungi	management_transition_vs_conventional	-2.06856	0.00239082	DA	DA
Rhodotorula graminis	Fungi	management_transition_vs_conventional	-3.32188	5.33649e-07	DA	DA
Rhodotorula sp.	Fungi	management_transition_vs_conventional	-1.87976	0.00695647	DA	not sig
Tremella sp.	Fungi	management_transition_vs_conventional	1.91338	0.000587859	DA	not sig
Saitozyma podzolica	Fungi	management_transition_vs_conventional	-0.993355	0.0361791	DA	not sig
Diversispora sp.	Fungi	management_transition_vs_conventional	3.59172	6.23898e-09	DA	DA
Glomus sp.	Fungi	management_transition_vs_conventional	1.54936	0.00895955	DA	not sig
Rhizophagus irregularis	Fungi	management_transition_vs_conventional	1.50572	0.00972795	DA	not sig
Mortierella sclerotiella	Fungi	management_transition_vs_conventional	2.98494	3.79093e-07	DA	DA
Mortierella stylospora	Fungi	management_transition_vs_conventional	4.02446	1.59645e-09	DA	DA
Mortierella tsukubaensis	Fungi	management_transition_vs_conventional	-1.57691	0.023618	DA	not sig
Bifiguratus adelaidae	Fungi	management_transition_vs_conventional	3.42168	6.34729e-10	DA	DA
Absidia glauca	Fungi	management_transition_vs_conventional	1.96817	0.000266308	DA	not sig
Absidia spinosa	Fungi	management_transition_vs_conventional	3.89927	1.34474e-11	DA	DA
Cunninghamella elegans	Fungi	management_transition_vs_conventional	1.93549	0.000266308	DA	not sig
Gongronella sp.	Fungi	management_transition_vs_conventional	-1.5343	0.0284259	DA	not sig
Mucor circinelloides	Fungi	management_transition_vs_conventional	-2.33581	0.000521052	DA	DA
Umbelopsis isabellina	Fungi	management_transition_vs_conventional	-1.78224	0.00820093	DA	not sig
Umbelopsis sp.	Fungi	management_transition_vs_conventional	1.36906	0.0386404	DA	not sig
Antennariella	Fungi	management_ecologic_vs_transition	3.06178	0.000337836	DA	DA
Capnodium	Fungi	management_ecologic_vs_transition	3.77968	1.60774e-05	DA	DA
Pyrenochaeta	Fungi	management_ecologic_vs_transition	2.40318	0.00120604	DA	DA
Pyrenochaetopsis	Fungi	management_ecologic_vs_transition	2.77379	3.63326e-06	DA	DA
Didymella	Fungi	management_ecologic_vs_transition	1.35823	0.0283852	DA	not sig
Epicoccum	Fungi	management_ecologic_vs_transition	3.56557	3.63326e-06	DA	DA
Pseudopithomyces	Fungi	management_ecologic_vs_transition	1.98338	0.0163561	DA	not sig
Paraleptosphaeria	Fungi	management_ecologic_vs_transition	-3.9958	1.06927e-06	DA	DA
Lophiostoma	Fungi	management_ecologic_vs_transition	1.84569	0.0108822	DA	not sig
Trematophoma	Fungi	management_ecologic_vs_transition	1.43443	0.0437838	DA	not sig
Didymocyrtis	Fungi	management_ecologic_vs_transition	1.91983	0.000968038	DA	not sig
Neosetophoma	Fungi	management_ecologic_vs_transition	-1.57323	0.0416389	DA	not sig
Parastagonospora	Fungi	management_ecologic_vs_transition	2.1373	0.00172652	DA	DA
Phaeosphaeriopsis	Fungi	management_ecologic_vs_transition	1.89164	0.0118741	DA	not sig
Curvularia	Fungi	management_ecologic_vs_transition	3.38159	0.000500799	DA	DA
Pyrenophora	Fungi	management_ecologic_vs_transition	2.05478	0.00201925	DA	DA
Pseudopyrenochaeta	Fungi	management_ecologic_vs_transition	-2.93616	0.000108586	DA	DA
Dendryphion	Fungi	management_ecologic_vs_transition	-1.27384	0.0272936	DA	not sig
Ochroconis	Fungi	management_ecologic_vs_transition	-1.53319	0.0299925	DA	not sig
Capronia	Fungi	management_ecologic_vs_transition	-1.67399	0.0458907	DA	not sig
Phialophora	Fungi	management_ecologic_vs_transition	2.07151	0.00417956	DA	DA
Neosartorya	Fungi	management_ecologic_vs_transition	-1.55871	0.00689876	DA	not sig
Sagenomella	Fungi	management_ecologic_vs_transition	-1.60473	0.023127	DA	not sig
Spiromastix	Fungi	management_ecologic_vs_transition	-2.33641	0.00444626	DA	DA
Trichosporiella	Fungi	management_ecologic_vs_transition	-1.54056	0.0486507	DA	not sig
Crocicreas	Fungi	management_ecologic_vs_transition	1.66978	0.0225006	DA	not sig
Oidiodendron	Fungi	management_ecologic_vs_transition	-1.58651	0.0395497	DA	not sig
Arthrobotrys	Fungi	management_ecologic_vs_transition	1.41279	0.0286149	DA	not sig
Lasiobolus	Fungi	management_ecologic_vs_transition	-1.5909	0.0255399	DA	not sig
Nadsonia	Fungi	management_ecologic_vs_transition	-2.82556	4.71148e-05	DA	DA
Diaporthe	Fungi	management_ecologic_vs_transition	-2.09347	0.00167843	DA	DA
Acrostalagmus	Fungi	management_ecologic_vs_transition	-1.46596	0.0272936	DA	not sig
Cephalosporium	Fungi	management_ecologic_vs_transition	1.77685	0.0104621	DA	not sig
Stachylidium	Fungi	management_ecologic_vs_transition	1.92134	0.0129109	DA	not sig
Collarina	Fungi	management_ecologic_vs_transition	2.0078	0.00113965	DA	DA
Pochonia	Fungi	management_ecologic_vs_transition	1.34449	0.0418135	DA	not sig
Emericellopsis	Fungi	management_ecologic_vs_transition	-1.68379	0.0235238	DA	not sig
Hirsutella	Fungi	management_ecologic_vs_transition	-1.58666	0.0225006	DA	not sig
Scopulariopsis	Fungi	management_ecologic_vs_transition	1.9769	0.00186171	DA	not sig
Acrophialophora	Fungi	management_ecologic_vs_transition	-2.22648	0.00330634	DA	DA
Arcopilus	Fungi	management_ecologic_vs_transition	-2.04823	0.0222461	DA	DA
Thermothielavioides	Fungi	management_ecologic_vs_transition	-1.50387	0.0273092	DA	not sig
Schizothecium	Fungi	management_ecologic_vs_transition	2.50078	0.000996574	DA	DA
Arthrinium	Fungi	management_ecologic_vs_transition	1.92947	0.0363986	DA	not sig
Leucoagaricus	Fungi	management_ecologic_vs_transition	3.54882	0.000104787	DA	DA
Tulostoma	Fungi	management_ecologic_vs_transition	2.64906	0.00024133	DA	DA
Bolbitius	Fungi	management_ecologic_vs_transition	1.50015	0.0235238	DA	not sig
Conocybe	Fungi	management_ecologic_vs_transition	2.48677	0.000996574	DA	DA
Campanella	Fungi	management_ecologic_vs_transition	1.772	0.0231631	DA	not sig
Marasmius	Fungi	management_ecologic_vs_transition	-3.84951	5.93224e-06	DA	DA
Lacrymaria	Fungi	management_ecologic_vs_transition	2.76115	0.000104787	DA	DA
Sphaerobolus	Fungi	management_ecologic_vs_transition	-1.43437	0.0338048	DA	not sig
Tremella	Fungi	management_ecologic_vs_transition	-1.2202	0.045501	DA	not sig
Tetragoniomyces	Fungi	management_ecologic_vs_transition	1.22747	0.0446569	DA	not sig
Diversispora	Fungi	management_ecologic_vs_transition	-1.96948	0.00330711	DA	not sig
Rhizophagus	Fungi	management_ecologic_vs_transition	-1.56513	0.0140194	DA	not sig
Bifiguratus	Fungi	management_ecologic_vs_transition	-2.53618	1.36325e-05	DA	DA
Absidia	Fungi	management_ecologic_vs_transition	-1.84364	0.0052413	DA	not sig
Cunninghamella	Fungi	management_ecologic_vs_transition	-2.06922	0.00325313	DA	DA
Umbelopsis	Fungi	management_ecologic_vs_transition	-1.63797	0.0186381	DA	not sig
Antennariella placitae	Fungi	management_ecologic_vs_transition	3.06178	0.000337836	DA	DA
Capnodium sp.	Fungi	management_ecologic_vs_transition	3.77968	1.60774e-05	DA	DA
Cladosporium sp.	Fungi	management_ecologic_vs_transition	2.22877	0.00237019	DA	DA
Pyrenochaeta sp.	Fungi	management_ecologic_vs_transition	2.45215	0.000968038	DA	DA
Pyrenochaetopsis leptospora	Fungi	management_ecologic_vs_transition	2.87271	9.21327e-06	DA	DA
Didymella exigua	Fungi	management_ecologic_vs_transition	1.36787	0.0273092	DA	not sig
Epicoccum nigrum	Fungi	management_ecologic_vs_transition	2.69357	0.000371101	DA	DA
Paraphaeosphaeria sp.	Fungi	management_ecologic_vs_transition	1.83311	0.00360982	DA	not sig
Pseudopithomyces chartarum	Fungi	management_ecologic_vs_transition	2.05627	0.0131505	DA	DA
Paraleptosphaeria rumicis	Fungi	management_ecologic_vs_transition	-3.9958	1.06927e-06	DA	DA
Lophiostoma sp.	Fungi	management_ecologic_vs_transition	2.26075	0.00201925	DA	DA
Trematophoma sp.	Fungi	management_ecologic_vs_transition	1.43443	0.0437838	DA	not sig
Didymocyrtis cladoniicola	Fungi	management_ecologic_vs_transition	1.91983	0.000968038	DA	not sig
Ophiosphaerella narmari	Fungi	management_ecologic_vs_transition	2.2924	0.00172652	DA	DA
Paraphoma radicina	Fungi	management_ecologic_vs_transition	1.79351	0.0199182	DA	not sig
Parastagonospora phoenicicola	Fungi	management_ecologic_vs_transition	2.1373	0.00172652	DA	DA
Phaeosphaeriopsis sp.	Fungi	management_ecologic_vs_transition	1.89164	0.0118741	DA	not sig
Alternaria lolii	Fungi	management_ecologic_vs_transition	-1.92373	0.00319927	DA	not sig
Curvularia spicifera	Fungi	management_ecologic_vs_transition	3.42896	0.000887275	DA	DA
Pyrenophora biseptata	Fungi	management_ecologic_vs_transition	1.24983	0.0368478	DA	not sig
Pseudopyrenochaeta lycopersici	Fungi	management_ecologic_vs_transition	-2.93616	0.000108586	DA	DA
Dendryphion nanum	Fungi	management_ecologic_vs_transition	-1.27384	0.0272936	DA	not sig
Torula sp.	Fungi	management_ecologic_vs_transition	1.96859	0.0022743	DA	not sig
Ochroconis bacilliformis	Fungi	management_ecologic_vs_transition	-2.33988	0.00224095	DA	DA
Cyphellophora sp.	Fungi	management_ecologic_vs_transition	-1.95697	0.00370449	DA	not sig
Cyphellophora vermispora	Fungi	management_ecologic_vs_transition	2.44085	0.000157194	DA	DA
Capronia sp.	Fungi	management_ecologic_vs_transition	-1.67399	0.0458907	DA	not sig
Exophiala xenobiotica	Fungi	management_ecologic_vs_transition	-3.94773	1.36325e-05	DA	DA
Phialophora mustea	Fungi	management_ecologic_vs_transition	3.11421	2.73578e-05	DA	DA
Phialophora sp.	Fungi	management_ecologic_vs_transition	3.42548	1.66409e-06	DA	DA
Aspergillus felis	Fungi	management_ecologic_vs_transition	-2.69233	0.00161285	DA	DA
Aspergillus flavipes	Fungi	management_ecologic_vs_transition	3.77551	1.1273e-10	DA	DA
Neosartorya sp.	Fungi	management_ecologic_vs_transition	-1.55871	0.00689876	DA	not sig
Penicillium alexiae	Fungi	management_ecologic_vs_transition	2.11329	0.00161285	DA	DA
Penicillium bilaiae	Fungi	management_ecologic_vs_transition	1.65929	0.0309526	DA	not sig
Penicillium brasilianum	Fungi	management_ecologic_vs_transition	2.03278	0.0028906	DA	DA
Penicillium canariense	Fungi	management_ecologic_vs_transition	1.69171	0.0231631	DA	not sig
Penicillium miczynskii	Fungi	management_ecologic_vs_transition	-2.40574	0.000463867	DA	DA
Penicillium moldavicum	Fungi	management_ecologic_vs_transition	-2.6353	0.00500108	DA	DA
Penicillium parvulum	Fungi	management_ecologic_vs_transition	-1.8311	0.0206611	DA	not sig
Penicillium pimiteouiense	Fungi	management_ecologic_vs_transition	3.32514	1.36325e-05	DA	DA
Penicillium simplicissimum	Fungi	management_ecologic_vs_transition	-1.39511	0.0393679	DA	not sig
Sagenomella diversispora	Fungi	management_ecologic_vs_transition	-2.15097	0.00905431	DA	DA
Sagenomella verticillata	Fungi	management_ecologic_vs_transition	-2.02788	0.00400493	DA	DA
Talaromyces atroroseus	Fungi	management_ecologic_vs_transition	2.10605	0.00172652	DA	DA
Talaromyces australis	Fungi	management_ecologic_vs_transition	2.3829	0.00166912	DA	DA
Talaromyces rogersiae	Fungi	management_ecologic_vs_transition	1.38198	0.0363986	DA	not sig
Talaromyces verruculosus	Fungi	management_ecologic_vs_transition	1.70634	0.00906858	DA	not sig
Emmonsiellopsis terrestris	Fungi	management_ecologic_vs_transition	1.55563	0.0239824	DA	not sig
Arachnomyces kanei	Fungi	management_ecologic_vs_transition	-1.39799	0.023127	DA	not sig
Chrysosporium merdarium	Fungi	management_ecologic_vs_transition	-2.43253	9.65812e-05	DA	DA
Chrysosporium queenslandicum	Fungi	management_ecologic_vs_transition	2.3667	0.00143801	DA	DA
Spiromastix sp.	Fungi	management_ecologic_vs_transition	-2.33641	0.00444626	DA	DA
Trichosporiella multisporum	Fungi	management_ecologic_vs_transition	-1.68894	0.0428271	DA	not sig
Crocicreas sp.	Fungi	management_ecologic_vs_transition	1.66978	0.0225006	DA	not sig
Tetracladium furcatum	Fungi	management_ecologic_vs_transition	-1.99798	0.015849	DA	not sig
Cistella sp.	Fungi	management_ecologic_vs_transition	1.38293	0.0235238	DA	not sig
Hyaloscypha sp.	Fungi	management_ecologic_vs_transition	-2.11859	0.0104621	DA	DA
Cadophora orchidicola	Fungi	management_ecologic_vs_transition	1.5813	0.0159825	DA	not sig
Oidiodendron chlamydosporicum	Fungi	management_ecologic_vs_transition	-2.43111	0.00421905	DA	DA
Oidiodendron flavum	Fungi	management_ecologic_vs_transition	-1.38502	0.0255399	DA	not sig
Oidiodendron griseum	Fungi	management_ecologic_vs_transition	1.77867	0.0230847	DA	not sig
Pseudeurotium ovale	Fungi	management_ecologic_vs_transition	1.58511	0.0432657	DA	not sig
Arthrobotrys oligospora	Fungi	management_ecologic_vs_transition	1.41119	0.0272936	DA	not sig
Lasiobolus papillatus	Fungi	management_ecologic_vs_transition	-1.5909	0.0255399	DA	not sig
Nadsonia starkeyi-henricii	Fungi	management_ecologic_vs_transition	-2.82556	4.71148e-05	DA	DA
Lipomyces sp.	Fungi	management_ecologic_vs_transition	-3.03501	1.36325e-05	DA	DA
Coniochaeta fasciculata	Fungi	management_ecologic_vs_transition	-1.50511	0.00847148	DA	not sig
Diaporthe sp.	Fungi	management_ecologic_vs_transition	-1.50399	0.0236871	DA	not sig
Acrostalagmus luteoalbus	Fungi	management_ecologic_vs_transition	-1.46596	0.0272936	DA	not sig
Cephalosporium gramineum	Fungi	management_ecologic_vs_transition	1.77685	0.0104621	DA	not sig
Stachylidium sp.	Fungi	management_ecologic_vs_transition	1.92134	0.0129109	DA	not sig
Collarina aurantiaca	Fungi	management_ecologic_vs_transition	2.0078	0.00113965	DA	DA
Pochonia chlamydosporia	Fungi	management_ecologic_vs_transition	1.34449	0.0418135	DA	not sig
Cordyceps javanica	Fungi	management_ecologic_vs_transition	-1.27741	0.0309526	DA	not sig
Acremonium flavum	Fungi	management_ecologic_vs_transition	-1.29096	0.0393679	DA	not sig
Emericellopsis minima	Fungi	management_ecologic_vs_transition	-2.18311	0.00201925	DA	DA
Sarocladium strictum	Fungi	management_ecologic_vs_transition	-1.55163	0.0231631	DA	not sig
Dactylonectria macrodidyma	Fungi	management_ecologic_vs_transition	-2.19778	0.00325313	DA	DA
Fusicolla aquaeductuum	Fungi	management_ecologic_vs_transition	1.75883	0.0140194	DA	not sig
Hirsutella minnesotensis	Fungi	management_ecologic_vs_transition	-1.31009	0.036375	DA	not sig
Cephalotrichum microsporum	Fungi	management_ecologic_vs_transition	-1.38461	0.023127	DA	not sig
Cephalotrichum verrucisporum	Fungi	management_ecologic_vs_transition	1.51771	0.0285452	DA	not sig
Lophotrichus fimeti	Fungi	management_ecologic_vs_transition	1.66324	0.023127	DA	not sig
Scopulariopsis brevicaulis	Fungi	management_ecologic_vs_transition	1.88363	0.00264952	DA	not sig
Sporothrix inflata	Fungi	management_ecologic_vs_transition	-1.24005	0.0479099	DA	not sig
Acrophialophora sp.	Fungi	management_ecologic_vs_transition	-2.22648	0.00330634	DA	DA
Arcopilus sp.	Fungi	management_ecologic_vs_transition	-3.42221	2.73578e-05	DA	DA
Chaetomium homopilatum	Fungi	management_ecologic_vs_transition	1.87427	0.00131169	DA	not sig
Chaetomium madrasense	Fungi	management_ecologic_vs_transition	-2.48182	0.00172652	DA	DA
Chaetomium subspirilliferum	Fungi	management_ecologic_vs_transition	-1.5966	0.0190375	DA	not sig
Thermothielavioides terrestris	Fungi	management_ecologic_vs_transition	-1.50387	0.0273092	DA	not sig
Schizothecium curvuloides	Fungi	management_ecologic_vs_transition	1.48801	0.0221063	DA	not sig
Arthrinium arundinis	Fungi	management_ecologic_vs_transition	1.92947	0.0363986	DA	not sig
Agaricus comtulus	Fungi	management_ecologic_vs_transition	1.4049	0.0338048	DA	not sig
Lepiota sp.	Fungi	management_ecologic_vs_transition	-1.49203	0.0338048	DA	not sig
Leucoagaricus tener	Fungi	management_ecologic_vs_transition	3.41442	1.36325e-05	DA	DA
Tulostoma sp.	Fungi	management_ecologic_vs_transition	2.64906	0.00024133	DA	DA
Bolbitius subvolvatus	Fungi	management_ecologic_vs_transition	1.50015	0.0235238	DA	not sig
Conocybe apala	Fungi	management_ecologic_vs_transition	1.85492	0.00444626	DA	not sig
Conocybe velutipes	Fungi	management_ecologic_vs_transition	1.60586	0.0328795	DA	not sig
Cortinarius leucopus	Fungi	management_ecologic_vs_transition	-1.44832	0.030998	DA	not sig
Inocybe flocculosa	Fungi	management_ecologic_vs_transition	-1.45498	0.0475934	DA	not sig
Bovista aestivalis	Fungi	management_ecologic_vs_transition	1.37964	0.036375	DA	not sig
Campanella caesia	Fungi	management_ecologic_vs_transition	1.772	0.0231631	DA	not sig
Marasmius oreades	Fungi	management_ecologic_vs_transition	-3.84916	2.72849e-06	DA	DA
Coprinellus xanthothrix	Fungi	management_ecologic_vs_transition	1.90667	0.00745997	DA	not sig
Coprinopsis urticicola	Fungi	management_ecologic_vs_transition	1.4463	0.0318614	DA	not sig
Lacrymaria lacrymabunda	Fungi	management_ecologic_vs_transition	2.76115	0.000104787	DA	DA
Sphaerobolus ingoldii	Fungi	management_ecologic_vs_transition	-1.43437	0.0338048	DA	not sig
Naganishia cerealis	Fungi	management_ecologic_vs_transition	1.69688	0.00779429	DA	not sig
Naganishia friedmannii	Fungi	management_ecologic_vs_transition	-2.71123	0.00131169	DA	DA
Papiliotrema terrestris	Fungi	management_ecologic_vs_transition	-1.63976	0.0231631	DA	not sig
Tremella sp.	Fungi	management_ecologic_vs_transition	-1.2202	0.045501	DA	not sig
Tetragoniomyces uliginosus	Fungi	management_ecologic_vs_transition	1.22747	0.0446569	DA	not sig
Diversispora sp.	Fungi	management_ecologic_vs_transition	-2.18274	0.0011369	DA	DA
Rhizophagus irregularis	Fungi	management_ecologic_vs_transition	-1.56513	0.0140194	DA	not sig
Mortierella amoeboidea	Fungi	management_ecologic_vs_transition	3.0966	0.000880142	DA	DA
Mortierella fatshederae	Fungi	management_ecologic_vs_transition	-2.0126	0.015849	DA	DA
Mortierella gamsii	Fungi	management_ecologic_vs_transition	-2.12388	0.015849	DA	DA
Mortierella sclerotiella	Fungi	management_ecologic_vs_transition	-2.10088	0.000968038	DA	DA
Mortierella stylospora	Fungi	management_ecologic_vs_transition	-4.20102	4.79089e-08	DA	DA
Bifiguratus adelaidae	Fungi	management_ecologic_vs_transition	-2.53618	1.36325e-05	DA	DA
Absidia glauca	Fungi	management_ecologic_vs_transition	-2.43065	9.5372e-05	DA	DA
Absidia spinosa	Fungi	management_ecologic_vs_transition	-2.79822	2.72849e-06	DA	DA
Cunninghamella elegans	Fungi	management_ecologic_vs_transition	-1.56578	0.00689876	DA	not sig
Cunninghamella sp.	Fungi	management_ecologic_vs_transition	-1.93705	0.0212997	DA	not sig
Mucor circinelloides	Fungi	management_ecologic_vs_transition	2.27901	0.00162605	DA	DA
Umbelopsis dimorpha	Fungi	management_ecologic_vs_transition	-2.19656	0.0117191	DA	DA
Umbelopsis nana	Fungi	management_ecologic_vs_transition	2.17673	0.00138669	DA	DA
Umbelopsis sp.	Fungi	management_ecologic_vs_transition	-1.65822	0.0164391	DA	not sig
Candidatus Nitrosotalea	Bacteria	management_ecologic_vs_conventional	-3.12208	8.68294e-05	DA	DA
Granulicella	Bacteria	management_ecologic_vs_conventional	-1.43736	0.0283586	DA	not sig
Occallatibacter	Bacteria	management_ecologic_vs_conventional	-1.49039	0.00972977	DA	not sig
Terracidiphilus	Bacteria	management_ecologic_vs_conventional	-2.43236	7.4497e-05	DA	DA
Vicinamibacter	Bacteria	management_ecologic_vs_conventional	1.17523	0.0258354	DA	not sig
Actinospica	Bacteria	management_ecologic_vs_conventional	-1.83247	0.0128798	DA	not sig
Williamsia	Bacteria	management_ecologic_vs_conventional	-1.80907	0.00328054	DA	not sig
Acidothermus	Bacteria	management_ecologic_vs_conventional	-1.24843	0.0212677	DA	not sig
Jatrophihabitans	Bacteria	management_ecologic_vs_conventional	-1.4273	0.000260956	DA	not sig
Blastococcus	Bacteria	management_ecologic_vs_conventional	-1.0313	0.00274559	DA	not sig
Glycomyces	Bacteria	management_ecologic_vs_conventional	1.50087	0.0109208	DA	not sig
Intrasporangium	Bacteria	management_ecologic_vs_conventional	-2.09105	0.0111309	DA	DA
Terrabacter	Bacteria	management_ecologic_vs_conventional	-1.45656	0.000614578	DA	not sig
Agreia	Bacteria	management_ecologic_vs_conventional	-1.34967	0.0439899	DA	not sig
Amnibacterium	Bacteria	management_ecologic_vs_conventional	-1.58386	0.0166631	DA	not sig
Leucobacter	Bacteria	management_ecologic_vs_conventional	1.5693	0.00795457	DA	not sig
Microterricola	Bacteria	management_ecologic_vs_conventional	1.87181	0.00192691	DA	not sig
Salinibacterium	Bacteria	management_ecologic_vs_conventional	1.31285	0.018312	DA	not sig
Yonghaparkia	Bacteria	management_ecologic_vs_conventional	-1.96703	0.00096969	DA	not sig
Paeniglutamicibacter	Bacteria	management_ecologic_vs_conventional	1.34643	0.04573	DA	not sig
Sinomonas	Bacteria	management_ecologic_vs_conventional	-2.32463	0.000614578	DA	DA
Cellulosimicrobium	Bacteria	management_ecologic_vs_conventional	1.27037	0.0384288	DA	not sig
Isoptericola	Bacteria	management_ecologic_vs_conventional	1.44635	0.0397796	DA	not sig
Promicromonospora	Bacteria	management_ecologic_vs_conventional	1.29237	0.0397796	DA	not sig
Sanguibacter-Flavimobilis	Bacteria	management_ecologic_vs_conventional	1.4612	0.00843043	DA	not sig
Actinocatenispora	Bacteria	management_ecologic_vs_conventional	-1.23953	0.0194126	DA	not sig
Dactylosporangium	Bacteria	management_ecologic_vs_conventional	0.769702	0.0264039	DA	not sig
Micromonospora	Bacteria	management_ecologic_vs_conventional	1.00533	0.018312	DA	not sig
Phytomonospora	Bacteria	management_ecologic_vs_conventional	1.21053	0.0397796	DA	not sig
Rugosimonospora	Bacteria	management_ecologic_vs_conventional	-1.40358	0.0190046	DA	not sig
Xiangella	Bacteria	management_ecologic_vs_conventional	-1.53055	0.014779	DA	not sig
Mumia	Bacteria	management_ecologic_vs_conventional	1.40144	0.0214712	DA	not sig
Amycolatopsis	Bacteria	management_ecologic_vs_conventional	0.936483	0.0242688	DA	not sig
Crossiella	Bacteria	management_ecologic_vs_conventional	-1.16815	0.0456979	DA	not sig
Nocardiopsis	Bacteria	management_ecologic_vs_conventional	2.35202	7.37092e-05	DA	DA
Conexibacter	Bacteria	management_ecologic_vs_conventional	-1.09139	0.000848335	DA	not sig
Chthonomonas	Bacteria	management_ecologic_vs_conventional	-1.16864	0.0272664	DA	not sig
Filimonas	Bacteria	management_ecologic_vs_conventional	-1.35571	0.0214712	DA	not sig
Terrimonas	Bacteria	management_ecologic_vs_conventional	1.25354	0.0161088	DA	not sig
Flavobacterium	Bacteria	management_ecologic_vs_conventional	2.34277	0.0133572	DA	DA
Citrifermentans	Bacteria	management_ecologic_vs_conventional	3.4455	6.30654e-08	DA	DA
Geobacter	Bacteria	management_ecologic_vs_conventional	3.18023	7.94856e-07	DA	DA
Alicyclobacillus	Bacteria	management_ecologic_vs_conventional	-1.72766	0.00657655	DA	not sig
Tumebacillus	Bacteria	management_ecologic_vs_conventional	-1.88208	5.4919e-05	DA	not sig
Planomicrobium	Bacteria	management_ecologic_vs_conventional	1.20906	0.0484363	DA	not sig
Pullulanibacillus	Bacteria	management_ecologic_vs_conventional	-1.66715	0.0207712	DA	not sig
Ammoniibacillus	Bacteria	management_ecologic_vs_conventional	-1.67592	0.0194126	DA	not sig
Oxalophagus	Bacteria	management_ecologic_vs_conventional	-2.15237	0.00274559	DA	DA
Thermobacillus	Bacteria	management_ecologic_vs_conventional	-1.78745	0.00806561	DA	not sig
Melghirimyces	Bacteria	management_ecologic_vs_conventional	2.07399	0.000602299	DA	DA
Thermoactinomyces	Bacteria	management_ecologic_vs_conventional	-1.19273	0.0498215	DA	not sig
Thermoflavimicrobium	Bacteria	management_ecologic_vs_conventional	-1.28866	0.0412703	DA	not sig
Clostridium sensu stricto 13	Bacteria	management_ecologic_vs_conventional	-1.75504	0.00642366	DA	not sig
Clostridium sensu stricto 9	Bacteria	management_ecologic_vs_conventional	1.12924	0.0498215	DA	not sig
Paraclostridium	Bacteria	management_ecologic_vs_conventional	-1.29804	0.0186053	DA	not sig
Nannocystis	Bacteria	management_ecologic_vs_conventional	1.19642	0.0283586	DA	not sig
Acidicaldus	Bacteria	management_ecologic_vs_conventional	-0.941211	0.028311	DA	not sig
Acidiphilium	Bacteria	management_ecologic_vs_conventional	-1.48468	0.0207712	DA	not sig
Acidisoma	Bacteria	management_ecologic_vs_conventional	-1.22994	0.028311	DA	not sig
Endobacter	Bacteria	management_ecologic_vs_conventional	-3.08622	7.4497e-05	DA	DA
Rhodopila	Bacteria	management_ecologic_vs_conventional	-1.47167	0.0135765	DA	not sig
SWB02	Bacteria	management_ecologic_vs_conventional	1.11897	0.0498215	DA	not sig
Dongia	Bacteria	management_ecologic_vs_conventional	1.25624	0.0109208	DA	not sig
Reyranella	Bacteria	management_ecologic_vs_conventional	0.929075	8.68294e-05	DA	not sig
Methylorosula	Bacteria	management_ecologic_vs_conventional	-1.06957	0.04573	DA	not sig
Hyphomicrobium	Bacteria	management_ecologic_vs_conventional	0.898429	0.0345249	DA	not sig
Pedomicrobium	Bacteria	management_ecologic_vs_conventional	0.959567	0.0439899	DA	not sig
Kaistia	Bacteria	management_ecologic_vs_conventional	1.66373	0.00362168	DA	not sig
Labrys	Bacteria	management_ecologic_vs_conventional	1.00968	0.0263271	DA	not sig
Aminobacter	Bacteria	management_ecologic_vs_conventional	1.22974	0.0335133	DA	not sig
Phyllobacterium	Bacteria	management_ecologic_vs_conventional	2.84186	1.31234e-05	DA	DA
Alsobacter	Bacteria	management_ecologic_vs_conventional	-0.935163	0.0264039	DA	not sig
Paracoccus	Bacteria	management_ecologic_vs_conventional	1.79498	0.000980158	DA	not sig
Porphyrobacter	Bacteria	management_ecologic_vs_conventional	-1.32044	0.014779	DA	not sig
Achromobacter	Bacteria	management_ecologic_vs_conventional	1.13436	0.0498215	DA	not sig
Aquabacterium	Bacteria	management_ecologic_vs_conventional	1.85013	0.00795457	DA	not sig
Comamonas	Bacteria	management_ecologic_vs_conventional	1.24402	0.019316	DA	not sig
Pelomonas	Bacteria	management_ecologic_vs_conventional	1.27838	0.0343996	DA	not sig
Pseudoduganella	Bacteria	management_ecologic_vs_conventional	1.42906	0.0345249	DA	not sig
Luminiphilus	Bacteria	management_ecologic_vs_conventional	1.59559	0.0177954	DA	not sig
Acinetobacter	Bacteria	management_ecologic_vs_conventional	1.22157	0.0283586	DA	not sig
Frateuria	Bacteria	management_ecologic_vs_conventional	-1.61993	0.0258354	DA	not sig
Pseudoxanthomonas	Bacteria	management_ecologic_vs_conventional	1.41767	0.0480186	DA	not sig
Candidatus Udaeobacter	Bacteria	management_ecologic_vs_conventional	0.774516	0.0296777	DA	not sig
Candidatus Nitrosotalea sp.	Bacteria	management_ecologic_vs_conventional	-3.12208	8.68294e-05	DA	DA
Granulicella sp.	Bacteria	management_ecologic_vs_conventional	-1.44268	0.0272664	DA	not sig
Occallatibacter sp.	Bacteria	management_ecologic_vs_conventional	-1.63357	0.00463607	DA	not sig
Terracidiphilus sp.	Bacteria	management_ecologic_vs_conventional	-2.43236	7.4497e-05	DA	DA
Tellurimicrobium sp.	Bacteria	management_ecologic_vs_conventional	1.4276	0.00472344	DA	not sig
Holophaga sp.	Bacteria	management_ecologic_vs_conventional	-1.47397	0.0375164	DA	not sig
Vicinamibacter sp.	Bacteria	management_ecologic_vs_conventional	1.17523	0.0258354	DA	not sig
Actinospica sp.	Bacteria	management_ecologic_vs_conventional	-1.82849	0.0132109	DA	not sig
Catenulispora cavernae	Bacteria	management_ecologic_vs_conventional	-1.83876	0.00877582	DA	not sig
Mycobacterium frederiksbergense	Bacteria	management_ecologic_vs_conventional	2.22207	0.000358268	DA	DA
Mycobacterium madagascariense	Bacteria	management_ecologic_vs_conventional	1.59722	0.0335133	DA	not sig
Mycobacterium tusciae	Bacteria	management_ecologic_vs_conventional	2.0646	0.0212677	DA	DA
Rhodococcus erythropolis	Bacteria	management_ecologic_vs_conventional	1.1981	0.04573	DA	not sig
Smaragdicoccus niigatensis	Bacteria	management_ecologic_vs_conventional	1.24206	0.0274622	DA	not sig
Williamsia sp.	Bacteria	management_ecologic_vs_conventional	-2.07463	0.000445439	DA	DA
Acidothermus sp.	Bacteria	management_ecologic_vs_conventional	-1.24843	0.0212677	DA	not sig
Jatrophihabitans sp.	Bacteria	management_ecologic_vs_conventional	-1.55781	7.28442e-05	DA	not sig
Blastococcus endophyticus	Bacteria	management_ecologic_vs_conventional	-2.68005	3.15775e-06	DA	DA
Blastococcus sp.	Bacteria	management_ecologic_vs_conventional	-0.827454	0.0149941	DA	not sig
Geodermatophilus arenarius	Bacteria	management_ecologic_vs_conventional	-2.36819	0.00150233	DA	DA
Geodermatophilus tzadiensis	Bacteria	management_ecologic_vs_conventional	-1.39797	0.0412703	DA	not sig
Nakamurella endophytica	Bacteria	management_ecologic_vs_conventional	1.19713	0.0300984	DA	not sig
Sporichthya sp.	Bacteria	management_ecologic_vs_conventional	1.02783	0.0412703	DA	not sig
Glycomyces algeriensis	Bacteria	management_ecologic_vs_conventional	1.26665	0.0317687	DA	not sig
Angustibacter luteus	Bacteria	management_ecologic_vs_conventional	1.79092	0.00103833	DA	not sig
Angustibacter peucedani	Bacteria	management_ecologic_vs_conventional	-1.44211	0.0122623	DA	not sig
Intrasporangium sp.	Bacteria	management_ecologic_vs_conventional	-2.09105	0.0109247	DA	DA
Nostocoida aromativora	Bacteria	management_ecologic_vs_conventional	-1.74311	0.00775769	DA	not sig
Pedococcus cremeus	Bacteria	management_ecologic_vs_conventional	-1.85718	0.000591218	DA	not sig
Pedococcus dokdonensis	Bacteria	management_ecologic_vs_conventional	1.24219	0.0375164	DA	not sig
Terrabacter sp.	Bacteria	management_ecologic_vs_conventional	-1.45656	0.000614578	DA	not sig
Agreia pratensis	Bacteria	management_ecologic_vs_conventional	-1.34967	0.0439899	DA	not sig
Agromyces sp.	Bacteria	management_ecologic_vs_conventional	-1.25526	0.0397796	DA	not sig
Amnibacterium sp.	Bacteria	management_ecologic_vs_conventional	-1.58386	0.0166631	DA	not sig
Microbacterium oxydans	Bacteria	management_ecologic_vs_conventional	1.39094	0.0306509	DA	not sig
Microterricola viridarii	Bacteria	management_ecologic_vs_conventional	1.87181	0.00192691	DA	not sig
Yonghaparkia alkaliphila	Bacteria	management_ecologic_vs_conventional	-1.96703	0.00096969	DA	not sig
Arthrobacter citreus	Bacteria	management_ecologic_vs_conventional	-1.7974	0.00806561	DA	not sig
Paeniglutamicibacter kerguelensis	Bacteria	management_ecologic_vs_conventional	1.34645	0.0412703	DA	not sig
Pseudarthrobacter polychromogenes	Bacteria	management_ecologic_vs_conventional	-2.4908	0.000445439	DA	DA
Sinomonas atrocyanea	Bacteria	management_ecologic_vs_conventional	-3.40012	1.43062e-06	DA	DA
Cellulosimicrobium cellulans	Bacteria	management_ecologic_vs_conventional	1.27037	0.0384288	DA	not sig
Isoptericola variabilis	Bacteria	management_ecologic_vs_conventional	1.44635	0.0397796	DA	not sig
Promicromonospora sukumoe	Bacteria	management_ecologic_vs_conventional	1.4766	0.0137672	DA	not sig
Actinocatenispora rupis	Bacteria	management_ecologic_vs_conventional	-1.43721	0.0101611	DA	not sig
Actinoplanes atraurantiacus	Bacteria	management_ecologic_vs_conventional	1.2875	0.0242688	DA	not sig
Actinoplanes digitatis	Bacteria	management_ecologic_vs_conventional	1.76614	0.00775769	DA	not sig
Actinoplanes sp.	Bacteria	management_ecologic_vs_conventional	1.27009	0.025554	DA	not sig
Actinoplanes tuftoflagellus	Bacteria	management_ecologic_vs_conventional	1.37821	0.0147259	DA	not sig
Dactylosporangium sp.	Bacteria	management_ecologic_vs_conventional	0.769702	0.0264039	DA	not sig
Luedemannella flava	Bacteria	management_ecologic_vs_conventional	1.07845	0.0412703	DA	not sig
Micromonospora chokoriensis	Bacteria	management_ecologic_vs_conventional	2.53768	1.49956e-05	DA	DA
Micromonospora coxensis	Bacteria	management_ecologic_vs_conventional	1.49296	0.00646106	DA	not sig
Phytomonospora sp.	Bacteria	management_ecologic_vs_conventional	1.21053	0.0397796	DA	not sig
Rugosimonospora sp.	Bacteria	management_ecologic_vs_conventional	-1.40358	0.0190046	DA	not sig
Micromonospora phaseoli	Bacteria	management_ecologic_vs_conventional	-1.53055	0.014779	DA	not sig
Aeromicrobium ginsengisoli	Bacteria	management_ecologic_vs_conventional	1.43372	0.0101611	DA	not sig
Aeromicrobium tamlense	Bacteria	management_ecologic_vs_conventional	1.25554	0.0296076	DA	not sig
Kribbella endophytica	Bacteria	management_ecologic_vs_conventional	1.73529	0.00612217	DA	not sig
Kribbella sandramycini	Bacteria	management_ecologic_vs_conventional	-1.87976	0.00806561	DA	not sig
Marmoricola solisilvae	Bacteria	management_ecologic_vs_conventional	-1.83431	0.00967379	DA	not sig
Mumia xiangluensis	Bacteria	management_ecologic_vs_conventional	1.40144	0.0214712	DA	not sig
Nocardioides baekrokdamisoli	Bacteria	management_ecologic_vs_conventional	-1.72796	0.0149686	DA	not sig
Nocardioides terrigena	Bacteria	management_ecologic_vs_conventional	1.26031	0.0497962	DA	not sig
Nocardioides ultimimeridianus	Bacteria	management_ecologic_vs_conventional	-1.85755	0.00677802	DA	not sig
Actinophytocola xanthii	Bacteria	management_ecologic_vs_conventional	1.35734	0.0289381	DA	not sig
Crossiella sp.	Bacteria	management_ecologic_vs_conventional	-1.16815	0.0456979	DA	not sig
Streptomyces albidoflavus	Bacteria	management_ecologic_vs_conventional	-1.84872	0.00274559	DA	not sig
Streptomyces atratus	Bacteria	management_ecologic_vs_conventional	1.34743	0.014779	DA	not sig
Streptomyces cyanogenus	Bacteria	management_ecologic_vs_conventional	-1.52959	0.0135765	DA	not sig
Streptomyces griseus	Bacteria	management_ecologic_vs_conventional	3.45541	2.09897e-06	DA	DA
Streptomyces lannensis	Bacteria	management_ecologic_vs_conventional	1.33038	0.0207712	DA	not sig
Streptomyces sp.	Bacteria	management_ecologic_vs_conventional	0.732308	0.0345249	DA	not sig
Streptomyces zaomyceticus	Bacteria	management_ecologic_vs_conventional	-1.76453	0.0122106	DA	not sig
Nocardiopsis sp.	Bacteria	management_ecologic_vs_conventional	2.26309	0.000121904	DA	DA
Actinoallomurus spadix	Bacteria	management_ecologic_vs_conventional	1.70482	0.000914324	DA	not sig
Gaiella occulta	Bacteria	management_ecologic_vs_conventional	1.1078	0.0345249	DA	not sig
Conexibacter sp.	Bacteria	management_ecologic_vs_conventional	-1.16256	0.000591218	DA	not sig
Conexibacter woesei	Bacteria	management_ecologic_vs_conventional	1.25027	0.00956154	DA	not sig
Solirubrobacter phytolaccae	Bacteria	management_ecologic_vs_conventional	-2.90958	7.4497e-05	DA	DA
Chthonomonas sp.	Bacteria	management_ecologic_vs_conventional	-1.16864	0.0272664	DA	not sig
Filimonas sp.	Bacteria	management_ecologic_vs_conventional	-1.35571	0.0214712	DA	not sig
Flavisolibacter ginsengiterrae	Bacteria	management_ecologic_vs_conventional	-1.14935	0.0486725	DA	not sig
Flavitalea sp.	Bacteria	management_ecologic_vs_conventional	1.11056	0.0335133	DA	not sig
Terrimonas sp.	Bacteria	management_ecologic_vs_conventional	1.37102	0.00795457	DA	not sig
Flavobacterium aquicola	Bacteria	management_ecologic_vs_conventional	1.8621	0.00328054	DA	not sig
Flavobacterium frigidimaris	Bacteria	management_ecologic_vs_conventional	2.3827	0.000121904	DA	DA
Flavobacterium sp.	Bacteria	management_ecologic_vs_conventional	1.92904	0.0281297	DA	not sig
Pedobacter ginsengisoli	Bacteria	management_ecologic_vs_conventional	1.31238	0.0285323	DA	not sig
Geobacter bemidjiensis	Bacteria	management_ecologic_vs_conventional	1.67412	0.00300185	DA	not sig
Geobacter sp.	Bacteria	management_ecologic_vs_conventional	2.45276	8.81485e-05	DA	DA
Alicyclobacillus sp.	Bacteria	management_ecologic_vs_conventional	-1.35514	0.0274268	DA	not sig
Tumebacillus sp.	Bacteria	management_ecologic_vs_conventional	-2.1816	7.94856e-07	DA	DA
Bacillus murimartini	Bacteria	management_ecologic_vs_conventional	1.28254	0.0276725	DA	not sig
Bacillus sporothermodurans	Bacteria	management_ecologic_vs_conventional	-1.20582	0.0458287	DA	not sig
Bacillus subtilis	Bacteria	management_ecologic_vs_conventional	-1.83488	0.00998911	DA	not sig
Pseudogracilibacillus sp.	Bacteria	management_ecologic_vs_conventional	1.27189	0.0397796	DA	not sig
Virgibacillus pantothenticus	Bacteria	management_ecologic_vs_conventional	1.57587	0.0112804	DA	not sig
Lysinibacillus fusiformis	Bacteria	management_ecologic_vs_conventional	-1.38412	0.021334	DA	not sig
Planococcus ruber	Bacteria	management_ecologic_vs_conventional	1.20906	0.0484363	DA	not sig
Sporosarcina ureae	Bacteria	management_ecologic_vs_conventional	1.47242	0.0264039	DA	not sig
Pullulanibacillus sp.	Bacteria	management_ecologic_vs_conventional	-1.49672	0.0493143	DA	not sig
Caenibacillus caldisaponilyticus	Bacteria	management_ecologic_vs_conventional	-1.35666	0.0408797	DA	not sig
Ammoniibacillus agariperforans	Bacteria	management_ecologic_vs_conventional	-1.67592	0.0194126	DA	not sig
Oxalophagus oxalicus	Bacteria	management_ecologic_vs_conventional	-1.85235	0.00998911	DA	not sig
Paenibacillus cineris	Bacteria	management_ecologic_vs_conventional	-1.15839	0.042865	DA	not sig
Paenibacillus lautus	Bacteria	management_ecologic_vs_conventional	-1.1804	0.0419061	DA	not sig
Thermobacillus sp.	Bacteria	management_ecologic_vs_conventional	-1.68666	0.0142721	DA	not sig
Melghirimyces thermohalophilus	Bacteria	management_ecologic_vs_conventional	2.11933	0.000445439	DA	DA
Thermoactinomyces vulgaris	Bacteria	management_ecologic_vs_conventional	-1.40202	0.0207712	DA	not sig
Thermoflavimicrobium sp.	Bacteria	management_ecologic_vs_conventional	-1.28866	0.0412703	DA	not sig
Clostridium subterminale	Bacteria	management_ecologic_vs_conventional	-1.67501	0.00398395	DA	not sig
Bacteria_Firmicutes_Clostridia_Clostridiales_Clostridiaceae_Clostridium sensu stricto 9_Clostridium sp.	Bacteria	management_ecologic_vs_conventional	1.12924	0.0498215	DA	not sig
Paraclostridium sp.	Bacteria	management_ecologic_vs_conventional	-1.34709	0.014779	DA	not sig
Nannocystis sp.	Bacteria	management_ecologic_vs_conventional	1.19641	0.028311	DA	not sig
Candidatus Nitrospira nitrosa	Bacteria	management_ecologic_vs_conventional	-2.40986	0.0010492	DA	DA
Candidatus Nostocoida acidiphila	Bacteria	management_ecologic_vs_conventional	-1.60731	0.0101611	DA	not sig
Paludisphaera sp.	Bacteria	management_ecologic_vs_conventional	1.41826	0.0104248	DA	not sig
Acidicaldus sp.	Bacteria	management_ecologic_vs_conventional	-0.941211	0.028311	DA	not sig
Acidiphilium sp.	Bacteria	management_ecologic_vs_conventional	-1.48468	0.0207712	DA	not sig
Acidisoma sp.	Bacteria	management_ecologic_vs_conventional	-1.14518	0.0439899	DA	not sig
Endobacter sp.	Bacteria	management_ecologic_vs_conventional	-3.08622	7.4497e-05	DA	DA
Rhodopila sp.	Bacteria	management_ecologic_vs_conventional	-1.73221	0.00806561	DA	not sig
Phenylobacterium hankyongense	Bacteria	management_ecologic_vs_conventional	-1.46188	0.0218721	DA	not sig
Candidatus Nitrosoarchaeum limnia	Bacteria	management_ecologic_vs_conventional	1.11897	0.0498215	DA	not sig
Dongia sp.	Bacteria	management_ecologic_vs_conventional	1.25923	0.0106397	DA	not sig
Reyranella sp.	Bacteria	management_ecologic_vs_conventional	0.943247	0.000121904	DA	not sig
Devosia sp.	Bacteria	management_ecologic_vs_conventional	1.21989	0.0345249	DA	not sig
Hyphomicrobium sp.	Bacteria	management_ecologic_vs_conventional	0.88724	0.0412703	DA	not sig
Pedomicrobium sp.	Bacteria	management_ecologic_vs_conventional	0.963305	0.0432442	DA	not sig
Kaistia granuli	Bacteria	management_ecologic_vs_conventional	1.15163	0.0408147	DA	not sig
Kaistia sp.	Bacteria	management_ecologic_vs_conventional	1.46266	0.00972977	DA	not sig
Labrys sp.	Bacteria	management_ecologic_vs_conventional	1.01183	0.0234258	DA	not sig
Allorhizobium-Neorhizobium-Pararhizobium-Rhizobium sp.	Bacteria	management_ecologic_vs_conventional	1.03738	0.0486725	DA	not sig
Aminobacter aminovorans	Bacteria	management_ecologic_vs_conventional	1.34263	0.0214712	DA	not sig
Aminobacter sp.	Bacteria	management_ecologic_vs_conventional	1.72115	0.00515925	DA	not sig
Mesorhizobium alhagi	Bacteria	management_ecologic_vs_conventional	1.14064	0.0479913	DA	not sig
Phyllobacterium myrsinacearum	Bacteria	management_ecologic_vs_conventional	2.9912	3.15775e-06	DA	DA
Alsobacter metallidurans	Bacteria	management_ecologic_vs_conventional	-0.939907	0.0335133	DA	not sig
Bradyrhizobium sp.	Bacteria	management_ecologic_vs_conventional	1.84359	0.0268692	DA	not sig
Paracoccus sp.	Bacteria	management_ecologic_vs_conventional	1.62211	0.00438326	DA	not sig
Novosphingobium sp.	Bacteria	management_ecologic_vs_conventional	1.04035	0.0338236	DA	not sig
Porphyrobacter sp.	Bacteria	management_ecologic_vs_conventional	-1.59854	0.0188013	DA	not sig
Achromobacter xylosoxidans	Bacteria	management_ecologic_vs_conventional	1.13436	0.0498215	DA	not sig
Burkholderia pseudomallei	Bacteria	management_ecologic_vs_conventional	-1.35832	0.037583	DA	not sig
Caballeronia glathei	Bacteria	management_ecologic_vs_conventional	1.32653	0.0127099	DA	not sig
Paraburkholderia sartisoli	Bacteria	management_ecologic_vs_conventional	2.27202	0.000614578	DA	DA
Trinickia soli	Bacteria	management_ecologic_vs_conventional	-1.18125	0.0487633	DA	not sig
Comamonas sp.	Bacteria	management_ecologic_vs_conventional	1.22465	0.021257	DA	not sig
Pelomonas saccharophila	Bacteria	management_ecologic_vs_conventional	1.26472	0.021792	DA	not sig
Albidiferax ferrireducens	Bacteria	management_ecologic_vs_conventional	1.48305	0.0258354	DA	not sig
Sideroxydans sp.	Bacteria	management_ecologic_vs_conventional	1.23468	0.0444431	DA	not sig
Collimonas fungivorans	Bacteria	management_ecologic_vs_conventional	1.5701	0.0142721	DA	not sig
Massilia putida	Bacteria	management_ecologic_vs_conventional	-2.82625	0.000614578	DA	DA
Pseudoduganella sp.	Bacteria	management_ecologic_vs_conventional	1.42906	0.0345249	DA	not sig
Luminiphilus sp.	Bacteria	management_ecologic_vs_conventional	1.59559	0.0177954	DA	not sig
Pseudomonas koreensis	Bacteria	management_ecologic_vs_conventional	1.65991	0.00657655	DA	not sig
Pseudomonas putida	Bacteria	management_ecologic_vs_conventional	1.58806	0.0135765	DA	not sig
Dyella sp.	Bacteria	management_ecologic_vs_conventional	-1.45975	0.0198575	DA	not sig
Frateuria terrea	Bacteria	management_ecologic_vs_conventional	-2.31191	0.00166782	DA	DA
Luteimonas mephitis	Bacteria	management_ecologic_vs_conventional	1.42115	0.00998911	DA	not sig
Pseudoxanthomonas wuyuanensis	Bacteria	management_ecologic_vs_conventional	1.42174	0.0177561	DA	not sig
Candidatus Udaeobacter sp.	Bacteria	management_ecologic_vs_conventional	0.831336	0.0214447	DA	not sig
Candidatus Nitrososphaera	Bacteria	management_transition_vs_conventional	-1.39328	0.0398591	DA	not sig
Vicinamibacter	Bacteria	management_transition_vs_conventional	1.31138	0.0211052	DA	not sig
Williamsia	Bacteria	management_transition_vs_conventional	-1.60944	0.0181835	DA	not sig
Cryptosporangium	Bacteria	management_transition_vs_conventional	1.32478	0.0254692	DA	not sig
Intrasporangium	Bacteria	management_transition_vs_conventional	-4.82844	2.33489e-09	DA	DA
Oryzihumus	Bacteria	management_transition_vs_conventional	-1.45137	0.0305487	DA	not sig
Terrabacter	Bacteria	management_transition_vs_conventional	-1.43609	0.00162053	DA	not sig
Lysinimonas	Bacteria	management_transition_vs_conventional	1.65842	0.00458784	DA	not sig
Paeniglutamicibacter	Bacteria	management_transition_vs_conventional	2.2221	0.000441754	DA	DA
Rugosimonospora	Bacteria	management_transition_vs_conventional	-1.97268	0.00162053	DA	not sig
Aeromicrobium	Bacteria	management_transition_vs_conventional	1.07452	0.0461237	DA	not sig
Kribbella	Bacteria	management_transition_vs_conventional	0.948093	0.0361177	DA	not sig
Kibdelosporangium	Bacteria	management_transition_vs_conventional	1.77792	0.00162053	DA	not sig
Kitasatospora	Bacteria	management_transition_vs_conventional	-1.4532	0.0410557	DA	not sig
Nonomuraea	Bacteria	management_transition_vs_conventional	1.32131	0.0140081	DA	not sig
Streptosporangium	Bacteria	management_transition_vs_conventional	1.50866	0.00352138	DA	not sig
Actinocorallia	Bacteria	management_transition_vs_conventional	1.28419	0.0290917	DA	not sig
Solirubrobacter	Bacteria	management_transition_vs_conventional	0.855262	0.0410557	DA	not sig
Sporocytophaga	Bacteria	management_transition_vs_conventional	-1.61147	0.0254692	DA	not sig
Melghirimyces	Bacteria	management_transition_vs_conventional	1.64607	0.0191004	DA	not sig
Clostridium sensu stricto 12	Bacteria	management_transition_vs_conventional	-1.59739	0.0347179	DA	not sig
Clostridium sensu stricto 13	Bacteria	management_transition_vs_conventional	-1.95563	0.00352138	DA	not sig
Ruminiclostridium	Bacteria	management_transition_vs_conventional	-1.57938	0.0232691	DA	not sig
Anaerosalibacter	Bacteria	management_transition_vs_conventional	1.28126	0.0342944	DA	not sig
Paraclostridium	Bacteria	management_transition_vs_conventional	-2.03377	0.00138101	DA	DA
Isosphaera	Bacteria	management_transition_vs_conventional	-2.091	0.000859498	DA	DA
Belnapia	Bacteria	management_transition_vs_conventional	-1.27659	0.0219626	DA	not sig
SWB02	Bacteria	management_transition_vs_conventional	1.32635	0.0267725	DA	not sig
Constrictibacter	Bacteria	management_transition_vs_conventional	1.20176	0.0453165	DA	not sig
Methylorosula	Bacteria	management_transition_vs_conventional	-1.37674	0.0181835	DA	not sig
Arsenicitalea	Bacteria	management_transition_vs_conventional	1.66625	0.00804543	DA	not sig
Phyllobacterium	Bacteria	management_transition_vs_conventional	2.1768	0.00292224	DA	DA
Porphyrobacter	Bacteria	management_transition_vs_conventional	-1.26175	0.0347179	DA	not sig
Geminicoccus	Bacteria	management_transition_vs_conventional	-1.28587	0.0397153	DA	not sig
Cupriavidus	Bacteria	management_transition_vs_conventional	1.5159	0.0159737	DA	not sig
Azohydromonas	Bacteria	management_transition_vs_conventional	1.46162	0.0374495	DA	not sig
Pelomonas	Bacteria	management_transition_vs_conventional	1.48302	0.0205012	DA	not sig
Pseudoduganella	Bacteria	management_transition_vs_conventional	1.46911	0.0453165	DA	not sig
Luminiphilus	Bacteria	management_transition_vs_conventional	1.62346	0.0262575	DA	not sig
Povalibacter	Bacteria	management_transition_vs_conventional	1.58118	0.0347179	DA	not sig
Frateuria	Bacteria	management_transition_vs_conventional	-1.57242	0.0484796	DA	not sig
Candidatus Nitrososphaera sp.	Bacteria	management_transition_vs_conventional	-1.40954	0.0398591	DA	not sig
Candidatus Koribacter versatilis	Bacteria	management_transition_vs_conventional	-1.38446	0.0410557	DA	not sig
Brevitalea deliciosa	Bacteria	management_transition_vs_conventional	2.46417	0.000263949	DA	DA
Vicinamibacter sp.	Bacteria	management_transition_vs_conventional	1.31138	0.0211052	DA	not sig
Mycobacterium brisbanense	Bacteria	management_transition_vs_conventional	-1.74924	0.00723885	DA	not sig
Mycobacterium elephantis	Bacteria	management_transition_vs_conventional	1.61429	0.0114425	DA	not sig
Mycobacterium frederiksbergense	Bacteria	management_transition_vs_conventional	1.46039	0.0480024	DA	not sig
Mycobacterium holsaticum	Bacteria	management_transition_vs_conventional	1.66936	0.00399551	DA	not sig
Mycobacterium madagascariense	Bacteria	management_transition_vs_conventional	1.64292	0.043274	DA	not sig
Mycobacterium tusciae	Bacteria	management_transition_vs_conventional	2.19554	0.0253013	DA	DA
Rhodococcus hoagii	Bacteria	management_transition_vs_conventional	-1.76276	0.00751336	DA	not sig
Rhodococcus jostii	Bacteria	management_transition_vs_conventional	1.74722	0.00150713	DA	not sig
Williamsia sp.	Bacteria	management_transition_vs_conventional	-1.83512	0.00360178	DA	not sig
Cryptosporangium sp.	Bacteria	management_transition_vs_conventional	1.32478	0.0254692	DA	not sig
Geodermatophilus daqingensis	Bacteria	management_transition_vs_conventional	-1.70889	0.00244201	DA	not sig
Geodermatophilus sabuli	Bacteria	management_transition_vs_conventional	1.88636	0.000374628	DA	not sig
Geodermatophilus sp.	Bacteria	management_transition_vs_conventional	1.09166	0.0254692	DA	not sig
Kineosporia rhamnosa	Bacteria	management_transition_vs_conventional	1.22946	0.0348123	DA	not sig
Intrasporangium sp.	Bacteria	management_transition_vs_conventional	-5.14924	9.08661e-10	DA	DA
Janibacter alkaliphilus	Bacteria	management_transition_vs_conventional	-2.33539	0.00348737	DA	DA
Oryzihumus sp.	Bacteria	management_transition_vs_conventional	-1.53318	0.0429388	DA	not sig
Nostocoida aromativora	Bacteria	management_transition_vs_conventional	-2.61405	0.000374628	DA	DA
Pedococcus cremeus	Bacteria	management_transition_vs_conventional	-1.23441	0.0347179	DA	not sig
Terrabacter sp.	Bacteria	management_transition_vs_conventional	-1.43609	0.00162053	DA	not sig
Lysinimonas soli	Bacteria	management_transition_vs_conventional	1.41236	0.0299396	DA	not sig
Lysinimonas sp.	Bacteria	management_transition_vs_conventional	1.18066	0.0411973	DA	not sig
Microbacterium flavescens	Bacteria	management_transition_vs_conventional	3.47539	2.33489e-09	DA	DA
Microbacterium hominis	Bacteria	management_transition_vs_conventional	-2.26224	0.000587367	DA	DA
Microbacterium pumilum	Bacteria	management_transition_vs_conventional	-2.54612	0.000374628	DA	DA
Paeniglutamicibacter kerguelensis	Bacteria	management_transition_vs_conventional	2.08612	0.000862405	DA	DA
Actinoplanes digitatis	Bacteria	management_transition_vs_conventional	1.78078	0.0114425	DA	not sig
Micromonospora chokoriensis	Bacteria	management_transition_vs_conventional	2.08852	0.00138101	DA	DA
Micromonospora echinofusca	Bacteria	management_transition_vs_conventional	1.16405	0.0495649	DA	not sig
Rugosimonospora sp.	Bacteria	management_transition_vs_conventional	-1.97268	0.00162053	DA	not sig
Aeromicrobium sp.	Bacteria	management_transition_vs_conventional	1.69323	0.0182105	DA	not sig
Kribbella endophytica	Bacteria	management_transition_vs_conventional	2.24508	0.000374628	DA	DA
Kribbella sandramycini	Bacteria	management_transition_vs_conventional	-2.61702	0.000859498	DA	DA
Marmoricola solisilvae	Bacteria	management_transition_vs_conventional	-1.52663	0.0432349	DA	not sig
Nocardioides alpinus	Bacteria	management_transition_vs_conventional	1.50345	0.00352138	DA	not sig
Nocardioides baekrokdamisoli	Bacteria	management_transition_vs_conventional	-1.69247	0.0306853	DA	not sig
Nocardioides iriomotensis	Bacteria	management_transition_vs_conventional	-3.40632	0.000374628	DA	DA
Nocardioides ultimimeridianus	Bacteria	management_transition_vs_conventional	-2.44213	0.00124382	DA	DA
Amycolatopsis rhabdoformis	Bacteria	management_transition_vs_conventional	1.77581	0.0183183	DA	not sig
Kibdelosporangium sp.	Bacteria	management_transition_vs_conventional	1.77792	0.00162053	DA	not sig
Kitasatospora aureofaciens	Bacteria	management_transition_vs_conventional	-1.49489	0.0493183	DA	not sig
Streptomyces atratus	Bacteria	management_transition_vs_conventional	1.23478	0.042924	DA	not sig
Streptomyces niveus	Bacteria	management_transition_vs_conventional	3.04123	4.61085e-05	DA	DA
Nonomuraea kuesteri	Bacteria	management_transition_vs_conventional	1.29621	0.0189942	DA	not sig
Streptosporangium roseum	Bacteria	management_transition_vs_conventional	1.5719	0.00198338	DA	not sig
Actinocorallia longicatena	Bacteria	management_transition_vs_conventional	1.43282	0.00804543	DA	not sig
Gaiella occulta	Bacteria	management_transition_vs_conventional	1.32936	0.0167837	DA	not sig
Solirubrobacter phytolaccae	Bacteria	management_transition_vs_conventional	-2.90658	0.000374628	DA	DA
Solirubrobacter sp.	Bacteria	management_transition_vs_conventional	0.945875	0.0268321	DA	not sig
Ferruginibacter yonginensis	Bacteria	management_transition_vs_conventional	1.35985	0.0254692	DA	not sig
Flavitalea sp.	Bacteria	management_transition_vs_conventional	1.17883	0.0386488	DA	not sig
Adhaeribacter sp.	Bacteria	management_transition_vs_conventional	1.67335	0.0121447	DA	not sig
Flavobacterium succinicans	Bacteria	management_transition_vs_conventional	-3.46696	1.89804e-05	DA	DA
Chryseobacterium indologenes	Bacteria	management_transition_vs_conventional	1.2796	0.0397153	DA	not sig
Tumebacillus avium	Bacteria	management_transition_vs_conventional	1.65825	0.00162053	DA	not sig
Bacillus cereus	Bacteria	management_transition_vs_conventional	-1.03365	0.0299939	DA	not sig
Bacillus longiquaesitum	Bacteria	management_transition_vs_conventional	1.75076	0.00804543	DA	not sig
Quasibacillus thermotolerans	Bacteria	management_transition_vs_conventional	2.32532	0.000901446	DA	DA
Compostibacillus humi	Bacteria	management_transition_vs_conventional	1.41042	0.0305487	DA	not sig
Oceanobacillus caeni	Bacteria	management_transition_vs_conventional	1.47767	0.0347179	DA	not sig
Ornithinibacillus heyuanensis	Bacteria	management_transition_vs_conventional	1.27745	0.0386488	DA	not sig
Lysinibacillus fusiformis	Bacteria	management_transition_vs_conventional	-1.53975	0.0208657	DA	not sig
Paenibacillus glycanilyticus	Bacteria	management_transition_vs_conventional	1.11325	0.0453165	DA	not sig
Paenibacillus sepulcri	Bacteria	management_transition_vs_conventional	1.18225	0.0461237	DA	not sig
Kroppenstedtia sp.	Bacteria	management_transition_vs_conventional	1.38304	0.0352115	DA	not sig
Melghirimyces thermohalophilus	Bacteria	management_transition_vs_conventional	1.66955	0.0181835	DA	not sig
Planifilum fulgidum	Bacteria	management_transition_vs_conventional	1.58479	0.0386488	DA	not sig
Clostridium subterminale	Bacteria	management_transition_vs_conventional	-2.46385	0.000263949	DA	DA
Ruminiclostridium sp.	Bacteria	management_transition_vs_conventional	-1.35428	0.0411973	DA	not sig
Anaerosalibacter bizertensis	Bacteria	management_transition_vs_conventional	1.24826	0.0387027	DA	not sig
Paraclostridium sp.	Bacteria	management_transition_vs_conventional	-2.03377	0.00138101	DA	DA
Romboutsia sp.	Bacteria	management_transition_vs_conventional	-1.33393	0.0410557	DA	not sig
Nitrospira japonica	Bacteria	management_transition_vs_conventional	-2.21326	0.00354373	DA	DA
Isosphaera sp.	Bacteria	management_transition_vs_conventional	-2.091	0.000859498	DA	DA
Belnapia sp.	Bacteria	management_transition_vs_conventional	-1.28488	0.0211867	DA	not sig
Candidatus Nitrosoarchaeum limnia	Bacteria	management_transition_vs_conventional	1.32635	0.0267725	DA	not sig
Constrictibacter sp.	Bacteria	management_transition_vs_conventional	1.20176	0.0453165	DA	not sig
Reyranella aquatilis	Bacteria	management_transition_vs_conventional	1.88495	0.00336538	DA	not sig
Microvirga guangxiensis	Bacteria	management_transition_vs_conventional	1.33415	0.0411235	DA	not sig
Arsenicitalea sp.	Bacteria	management_transition_vs_conventional	1.66625	0.00804543	DA	not sig
Phyllobacterium myrsinacearum	Bacteria	management_transition_vs_conventional	2.4304	0.000829928	DA	DA
Rhizorhabdus argentea	Bacteria	management_transition_vs_conventional	1.73914	0.00409762	DA	not sig
Candidatus Halyseosphaera europeae	Bacteria	management_transition_vs_conventional	1.4185	0.0129186	DA	not sig
Geminicoccus sp.	Bacteria	management_transition_vs_conventional	-1.28587	0.0397153	DA	not sig
Trinickia soli	Bacteria	management_transition_vs_conventional	-1.81725	0.00725241	DA	not sig
Azohydromonas sp.	Bacteria	management_transition_vs_conventional	1.46165	0.0397153	DA	not sig
Nitrosospira multiformis	Bacteria	management_transition_vs_conventional	1.72146	0.0119357	DA	not sig
Noviherbaspirillum suwonense	Bacteria	management_transition_vs_conventional	-1.23419	0.0374495	DA	not sig
Pseudoduganella sp.	Bacteria	management_transition_vs_conventional	1.46911	0.0453165	DA	not sig
Legionella pneumophila	Bacteria	management_transition_vs_conventional	1.31669	0.030825	DA	not sig
Cellvibrio mixtus	Bacteria	management_transition_vs_conventional	1.34483	0.0361177	DA	not sig
Luminiphilus sp.	Bacteria	management_transition_vs_conventional	1.62346	0.0262575	DA	not sig
Povalibacter uvarum	Bacteria	management_transition_vs_conventional	1.57493	0.0352115	DA	not sig
Steroidobacter flavus	Bacteria	management_transition_vs_conventional	1.50001	0.0113782	DA	not sig
Frateuria terrea	Bacteria	management_transition_vs_conventional	-1.7831	0.0254692	DA	not sig
Lysobacter soli	Bacteria	management_transition_vs_conventional	1.21484	0.0367652	DA	not sig
Candidatus Nitrosotalea	Bacteria	management_ecologic_vs_transition	-2.88062	0.00222106	DA	DA
Terracidiphilus	Bacteria	management_ecologic_vs_transition	-1.96502	0.0072942	DA	not sig
Blastococcus	Bacteria	management_ecologic_vs_transition	-0.985099	0.0168148	DA	not sig
Intrasporangium	Bacteria	management_ecologic_vs_transition	2.73739	0.00691383	DA	DA
Yonghaparkia	Bacteria	management_ecologic_vs_transition	-2.45928	0.000162473	DA	DA
Cellulosimicrobium	Bacteria	management_ecologic_vs_transition	1.65624	0.0297178	DA	not sig
Luedemannella	Bacteria	management_ecologic_vs_transition	1.35451	0.0395701	DA	not sig
Umezawaea	Bacteria	management_ecologic_vs_transition	-1.46637	0.0297178	DA	not sig
Nocardiopsis	Bacteria	management_ecologic_vs_transition	2.47337	0.000503915	DA	DA
Motilibacter	Bacteria	management_ecologic_vs_transition	-1.34244	0.0302848	DA	not sig
Actinomadura	Bacteria	management_ecologic_vs_transition	-1.23855	0.00853701	DA	not sig
Cytophaga	Bacteria	management_ecologic_vs_transition	1.70638	0.0304053	DA	not sig
Sporocytophaga	Bacteria	management_ecologic_vs_transition	1.74845	0.021512	DA	not sig
Nitrolancea	Bacteria	management_ecologic_vs_transition	-1.93845	0.00484221	DA	not sig
Citrifermentans	Bacteria	management_ecologic_vs_transition	4.22318	2.83405e-08	DA	DA
Geobacter	Bacteria	management_ecologic_vs_transition	3.77085	6.48103e-07	DA	DA
Alicyclobacillus	Bacteria	management_ecologic_vs_transition	-1.98343	0.00305238	DA	not sig
Tumebacillus	Bacteria	management_ecologic_vs_transition	-1.553	0.00484221	DA	not sig
Peribacillus	Bacteria	management_ecologic_vs_transition	-1.5946	0.0260251	DA	not sig
Ammoniibacillus	Bacteria	management_ecologic_vs_transition	-2.5553	0.00042104	DA	DA
Oxalophagus	Bacteria	management_ecologic_vs_transition	-1.90375	0.0270142	DA	not sig
Thermobacillus	Bacteria	management_ecologic_vs_transition	-1.92886	0.00905154	DA	not sig
Thermoactinomyces	Bacteria	management_ecologic_vs_transition	-1.42012	0.0423678	DA	not sig
Halocella	Bacteria	management_ecologic_vs_transition	-2.00958	0.00433998	DA	DA
Paludisphaera	Bacteria	management_ecologic_vs_transition	1.53767	0.0231453	DA	not sig
Endobacter	Bacteria	management_ecologic_vs_transition	-2.66984	0.00329176	DA	DA
Rhodopila	Bacteria	management_ecologic_vs_transition	-1.74382	0.00835824	DA	not sig
Arsenicitalea	Bacteria	management_ecologic_vs_transition	-1.49905	0.0342157	DA	not sig
Kaistia	Bacteria	management_ecologic_vs_transition	2.42077	0.00042104	DA	DA
Azohydromonas	Bacteria	management_ecologic_vs_transition	-1.9298	0.00793222	DA	not sig
Candidatus Nitrosotalea sp.	Bacteria	management_ecologic_vs_transition	-2.88062	0.00222106	DA	DA
Terracidiphilus sp.	Bacteria	management_ecologic_vs_transition	-1.96502	0.0072942	DA	not sig
Tellurimicrobium sp.	Bacteria	management_ecologic_vs_transition	1.76898	0.00433998	DA	not sig
Mycobacterium elephantis	Bacteria	management_ecologic_vs_transition	-1.56159	0.0297178	DA	not sig
Rhodococcus jostii	Bacteria	management_ecologic_vs_transition	-1.70425	0.00519424	DA	not sig
Blastococcus endophyticus	Bacteria	management_ecologic_vs_transition	-2.06683	0.00305238	DA	DA
Blastococcus sp.	Bacteria	management_ecologic_vs_transition	-0.89911	0.0259752	DA	not sig
Geodermatophilus arenarius	Bacteria	management_ecologic_vs_transition	-2.61038	0.00203524	DA	DA
Geodermatophilus daqingensis	Bacteria	management_ecologic_vs_transition	1.68093	0.00616756	DA	not sig
Geodermatophilus sabuli	Bacteria	management_ecologic_vs_transition	-1.77517	0.00248709	DA	not sig
Geodermatophilus tzadiensis	Bacteria	management_ecologic_vs_transition	-2.25244	0.00144263	DA	DA
Intrasporangium sp.	Bacteria	management_ecologic_vs_transition	3.05819	0.00296212	DA	DA
Janibacter alkaliphilus	Bacteria	management_ecologic_vs_transition	2.33735	0.00616756	DA	DA
Microbacterium flavescens	Bacteria	management_ecologic_vs_transition	-3.40683	2.01686e-07	DA	DA
Microbacterium pumilum	Bacteria	management_ecologic_vs_transition	2.79112	0.000162473	DA	DA
Yonghaparkia alkaliphila	Bacteria	management_ecologic_vs_transition	-2.45928	0.000162473	DA	DA
Pseudarthrobacter polychromogenes	Bacteria	management_ecologic_vs_transition	-2.95936	0.000162473	DA	DA
Sinomonas atrocyanea	Bacteria	management_ecologic_vs_transition	-2.13895	0.0182054	DA	DA
Cellulosimicrobium cellulans	Bacteria	management_ecologic_vs_transition	1.65624	0.0297178	DA	not sig
Promicromonospora sukumoe	Bacteria	management_ecologic_vs_transition	1.53587	0.0380584	DA	not sig
Luedemannella flava	Bacteria	management_ecologic_vs_transition	1.49979	0.0297178	DA	not sig
Micromonospora coxensis	Bacteria	management_ecologic_vs_transition	1.49899	0.0270142	DA	not sig
Aeromicrobium sp.	Bacteria	management_ecologic_vs_transition	-1.82361	0.0184017	DA	not sig
Nocardioides alpinus	Bacteria	management_ecologic_vs_transition	-1.2487	0.0317865	DA	not sig
Nocardioides iriomotensis	Bacteria	management_ecologic_vs_transition	3.71203	0.000162473	DA	DA
Umezawaea tangerina	Bacteria	management_ecologic_vs_transition	-1.46637	0.0297178	DA	not sig
Streptomyces albidoflavus	Bacteria	management_ecologic_vs_transition	-1.5485	0.0401339	DA	not sig
Streptomyces griseus	Bacteria	management_ecologic_vs_transition	3.59427	4.97173e-05	DA	DA
Streptomyces niveus	Bacteria	management_ecologic_vs_transition	-1.76571	0.0395701	DA	not sig
Nocardiopsis sp.	Bacteria	management_ecologic_vs_transition	2.38444	0.00110943	DA	DA
Nonomuraea kuesteri	Bacteria	management_ecologic_vs_transition	-1.23591	0.0423678	DA	not sig
Motilibacter sp.	Bacteria	management_ecologic_vs_transition	-1.34244	0.0302848	DA	not sig
Actinomadura nitritigenes	Bacteria	management_ecologic_vs_transition	-2.47764	0.00304135	DA	DA
Chitinophaga sp.	Bacteria	management_ecologic_vs_transition	2.25828	0.00203524	DA	DA
Cytophaga sp.	Bacteria	management_ecologic_vs_transition	1.68781	0.0395701	DA	not sig
Sporocytophaga sp.	Bacteria	management_ecologic_vs_transition	1.52738	0.0395701	DA	not sig
Flavobacterium frigidimaris	Bacteria	management_ecologic_vs_transition	1.64259	0.0297178	DA	not sig
Flavobacterium succinicans	Bacteria	management_ecologic_vs_transition	2.51659	0.00616756	DA	DA
Nitrolancea sp.	Bacteria	management_ecologic_vs_transition	-1.93845	0.00484221	DA	not sig
Geobacter bemidjiensis	Bacteria	management_ecologic_vs_transition	2.4165	0.000526841	DA	DA
Geobacter sp.	Bacteria	management_ecologic_vs_transition	2.68107	0.000484637	DA	DA
Alicyclobacillus sp.	Bacteria	management_ecologic_vs_transition	-1.49696	0.0302848	DA	not sig
Tumebacillus avium	Bacteria	management_ecologic_vs_transition	-1.38259	0.0222156	DA	not sig
Tumebacillus sp.	Bacteria	management_ecologic_vs_transition	-1.63244	0.00222106	DA	not sig
Bacillus subtilis	Bacteria	management_ecologic_vs_transition	-2.09271	0.00616756	DA	DA
Oceanobacillus caeni	Bacteria	management_ecologic_vs_transition	-1.79673	0.0203729	DA	not sig
Peribacillus muralis	Bacteria	management_ecologic_vs_transition	-1.52385	0.0301368	DA	not sig
Ammoniibacillus agariperforans	Bacteria	management_ecologic_vs_transition	-2.5553	0.00042104	DA	DA
Thermobacillus sp.	Bacteria	management_ecologic_vs_transition	-1.84385	0.0184017	DA	not sig
Halocella sp.	Bacteria	management_ecologic_vs_transition	-2.00958	0.00433998	DA	DA
Candidatus Nitrospira nitrosa	Bacteria	management_ecologic_vs_transition	-2.00657	0.0270142	DA	DA
Nitrospira japonica	Bacteria	management_ecologic_vs_transition	2.20824	0.00691383	DA	DA
Paludisphaera sp.	Bacteria	management_ecologic_vs_transition	1.44292	0.0309121	DA	not sig
Endobacter sp.	Bacteria	management_ecologic_vs_transition	-2.66984	0.00329176	DA	DA
Rhodopila sp.	Bacteria	management_ecologic_vs_transition	-1.9915	0.00616756	DA	not sig
Arsenicitalea sp.	Bacteria	management_ecologic_vs_transition	-1.49905	0.0342157	DA	not sig
Kaistia sp.	Bacteria	management_ecologic_vs_transition	2.10699	0.00203524	DA	DA
Bradyrhizobium sp.	Bacteria	management_ecologic_vs_transition	2.00456	0.0433172	DA	DA
Sphingomonas flava	Bacteria	management_ecologic_vs_transition	1.65862	0.0302848	DA	not sig
Candidatus Halyseosphaera europeae	Bacteria	management_ecologic_vs_transition	-1.42751	0.028379	DA	not sig
Paraburkholderia sartisoli	Bacteria	management_ecologic_vs_transition	2.13469	0.00691383	DA	DA
Azohydromonas sp.	Bacteria	management_ecologic_vs_transition	-2.17498	0.00305238	DA	DA
Massilia putida	Bacteria	management_ecologic_vs_transition	-3.51534	0.000130874	DA	DA
Cellvibrio mixtus	Bacteria	management_ecologic_vs_transition	-1.6118	0.0259752	DA	not sig
Luteimonas mephitis	Bacteria	management_ecologic_vs_transition	1.52731	0.0247952	DA	not sig
Lysobacter soli	Bacteria	management_ecologic_vs_transition	-1.39368	0.0342157	DA	not sig
Luteolibacter sp.	Bacteria	management_ecologic_vs_transition	1.55244	0.0304053	DA	not sig
